# Supplementary material for: Enthalpy of formation of 6-phenyl-1,5-diazabicyclo[3.1.0]hexane by combustion calorimetry and theoretical approach for efficient prediction of thermochemistry of diaziridines
Source: Royal Society of Chemistry journal article supplement (doi:10.1039/d3cp03290f), 2023-01-01
Supplement: d3cp03290f1.pdf [file d3cp03290f1.pdf]

## Electronic supplementary information

### **Enthalpy of formation of 6-phenyl-1,5-diazabicyclo[3.1.0]hexane by combustion calorimetry. Theoretical approach for efficient prediction of thermochemistry of diaziridines**

Vera A. Lukyanova,<sup>a</sup> Vladimir V. Kuznetsov,<sup>b</sup> Natalia M. Konstantinova,<sup>a</sup> Andrey S. Dmitrenok,<sup>b</sup>  
Maria P. Kosaya,<sup>a</sup> Olga V. Dorofeeva\*<sup>a</sup> and Anna I. Druzhinina<sup>a</sup>

<sup>a</sup> *Department of Chemistry, M.V. Lomonosov Moscow State University, 119991 Moscow, Russia.*

*E-mail: dorofeeva@phys.chem.msu.ru.*

<sup>b</sup> *N.D. Zelinsky Institute of Organic Chemistry, Russian Academy of Sciences, 119991 Moscow, Russia.*

| Contents                                                                                                                                                                                                                                                                                                                                                                              | page |
|---------------------------------------------------------------------------------------------------------------------------------------------------------------------------------------------------------------------------------------------------------------------------------------------------------------------------------------------------------------------------------------|------|
| <b>S1 Spectral characteristics</b>                                                                                                                                                                                                                                                                                                                                                    | 3    |
| <b>General remarks</b>                                                                                                                                                                                                                                                                                                                                                                | 3    |
| <b>Fig. S1</b> $^1\text{H}$ NMR spectrum of PDABH ( $\text{CDCl}_3$ ).                                                                                                                                                                                                                                                                                                                | 4    |
| <b>Fig. S2</b> Fragment 1 of the $^1\text{H}$ NMR spectrum of PDABH ( $\text{CDCl}_3$ ).                                                                                                                                                                                                                                                                                              | 4    |
| <b>Fig. S3</b> Fragment 2 of the $^1\text{H}$ NMR spectrum of PDABH ( $\text{CDCl}_3$ ).                                                                                                                                                                                                                                                                                              | 5    |
| <b>Fig. S4</b> $^{13}\text{C}$ NMR spectrum of PDABH ( $\text{CDCl}_3$ ).                                                                                                                                                                                                                                                                                                             | 5    |
| <b>Fig. S5</b> $\{^1\text{H}-^{13}\text{C}\}$ HSQC spectrum of PDABH ( $\text{CDCl}_3$ ).                                                                                                                                                                                                                                                                                             | 6    |
| <b>Fig. S6</b> $\{^1\text{H}-^{13}\text{C}\}$ HMBC spectrum of PDABH ( $\text{CDCl}_3$ ).                                                                                                                                                                                                                                                                                             | 6    |
| <b>Fig. S7</b> $\{^1\text{H}-^1\text{H}\}$ gNOESY spectrum of PDABH ( $\text{CDCl}_3$ ).                                                                                                                                                                                                                                                                                              | 7    |
| <b>Fig. S8</b> Fragment of $\{^1\text{H}-^1\text{H}\}$ gNOESY spectrum of PDABH ( $\text{CDCl}_3$ ). Proton H16 has cross-peaks with proton H19. Proton H15 has cross-peaks with protons H14 and H17.                                                                                                                                                                                 | 7    |
| <b>Fig. S9</b> Fragment of the $\{^1\text{H}-^1\text{H}\}$ gNOESY spectrum of PDABH ( $\text{CDCl}_3$ ). Proton H16 has cross-peaks with protons H13 and H18.                                                                                                                                                                                                                         | 8    |
| <b>Table S1</b> The $\{^1\text{H}-^{13}\text{C}\}$ HSQC, and $\{^1\text{H}-^{13}\text{C}\}$ HMBC data for PDABH (Fig. S5, S6).                                                                                                                                                                                                                                                        | 8    |
| <b>Table S2</b> Partial data $\{^1\text{H}-^1\text{H}\}$ gNOESY for PDABH (Fig. S7, S8).                                                                                                                                                                                                                                                                                              | 9    |
| <b>Fig. S10</b> Mass spectrum of PDABH.                                                                                                                                                                                                                                                                                                                                               | 9    |
| <b>S2 Melting characteristics of PDABH investigated by differential scanning calorimetry (DSC)</b>                                                                                                                                                                                                                                                                                    | 9    |
| <b>General remarks</b>                                                                                                                                                                                                                                                                                                                                                                | 9    |
| <b>Fig. S11</b> DSC curve of PDABH.                                                                                                                                                                                                                                                                                                                                                   | 10   |
| <b>Fig. S12</b> The results for the fractional melting of the PDABH sample: equilibrium temperature of PDABH sample melting $T$ vs $1/F$ , where $1/F$ is the reciprocal fraction of the sample melted.                                                                                                                                                                               | 10   |
| <b>S3 Theoretical calculations</b>                                                                                                                                                                                                                                                                                                                                                    |      |
| <b>Table S3</b> Cartesian coordinates of PDABH molecule optimized at B3LYP-D3(BJ)/def2-TZVPP level.                                                                                                                                                                                                                                                                                   | 11   |
| <b>Table S4</b> Enthalpies of formation of reference species used in working reactions and DLPNO-CCSD(T1)/CBS energies, ZPE and enthalpic corrections for the compounds studied.                                                                                                                                                                                                      | 12   |
| <b>Table S5</b> Enthalpies of formation of PDABH and some related compounds calculated by DLPNO-CCSD(T1)/CBS//B3LYP-D3(BJ)/def2-TZVPP and G4 methods using different working reactions (in kJ/mol at $T=298.15$ K).                                                                                                                                                                   | 14   |
| <b>Table S6</b> Molecular electrostatic potential parameters calculated for the molecular geometries optimized at the B3LYP/6-311++G(3df,2p) level and coefficients $a$ , $b$ , $c$ , $d$ , $e$ and $f$ in the equation relating the enthalpy of sublimation to the descriptors of electrostatic potential. Comparison between experimental and calculated enthalpies of sublimation. | 20   |
| <b>Table S7</b> Estimation of enthalpy of formation of PDABH by comparison with related compounds.                                                                                                                                                                                                                                                                                    | 29   |

## S1 Spectral characteristics

**General remarks.** Spectra of NMR were recorded on Bruker Avance 600 spectrometers at room temperature; the chemical shifts  $\delta$  were measured in ppm with respect to solvent ( $\text{CDCl}_3$ :  $^1\text{H}$ :  $\delta = 7.26$  ppm,  $^{13}\text{C}$ :  $\delta = 77.0$  ppm). Splitting patterns are designated as s, singlet; m, multiplet. Coupling constants ( $J$ ) are given in Hz. The structures of synthesized compounds were elucidated with the aid of 1D NMR ( $^1\text{H}$ ,  $^{13}\text{C}$ ) and 2D NMR (HSQC and HMBC  $^1\text{H}$ - $^{13}\text{C}$ , NOESY  $^1\text{H}$ - $^1\text{H}$ ) spectroscopies. The IR spectra were recorded on Bruker "Alpha" spectrometers in the range 400-4000  $\text{cm}^{-1}$  (resolution 2  $\text{cm}^{-1}$ ). High resolution mass spectra were recorded on a Bruker micro TOF-QTM spectrometer with electrospray ionization (ESI). All measurements were performed in a positive (+MS) ion mode (interface capillary voltage: 4500 V) with scan range  $m/z$ : 50-3000. External calibration of the mass spectrometer was performed with Electrospray Calibrant Solution (Fluka). A direct syringe injection was used for all analyzed solutions in MeCN (flow rate: 3  $\mu\text{L min}^{-1}$ ). Mass spectra were also measured using a Finnigan MAT INCOS-50 instrument. Melting point (mp) was determined using Electrothermal 9100 and SMP-20 capillary melting point apparatus; its value is 92.70  $^\circ\text{C}$  (365.85 K); literature data are 88-89  $^\circ\text{C}$  [1], 93-94  $^\circ\text{C}$  [2,3].

## References

1. Yu.B. Koptelov, M.Kh.Kim, A.P. Molchanov, R.R. Kostikov, Russ. J. Org. Chem. 35 (1999) 110–118.
2. A.P. Molchanov, D.I. Sipkin, Yu.B. Koptelov, R.R. Kostikov, Russ. J. Org. Chem. 37 (2001), 841–851.
3. V.V. Kuznetsov, S.A. Kutepov, N.N. Makhova, K.A. Lyssenko, D.E. Dmitriev, Russ. Chem. Bull. 52 (2003) 665–673.

**NMR, IR and mass spectra of PDABH.**  $^1\text{H}$  NMR ( $\text{CDCl}_3$ , 600.13 MHz):  $\delta = 1.84$ – $1.95$  (m, 2 H,

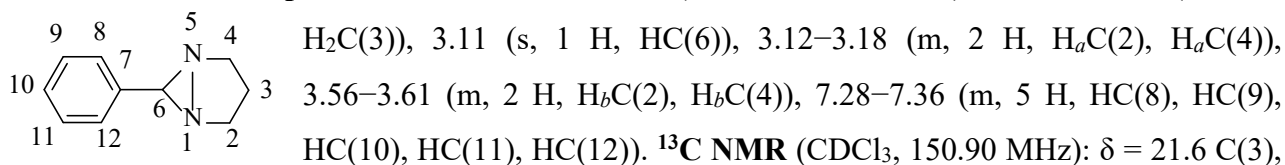

52.2 C(2), C(4), 56.6 C(6), 127.2 C(8), C(12), 128.2 C(9), C(11), 128.4 C(10), 137.0 C(7). **IR** (KBr):  $\nu = 3449, 3063, 2980, 2943, 2874, 2329, 2014, 1991, 1940, 1917, 1868, 1843, 1794, 1780, 1696, 1624, 1598, 1536, 1492, 1458, 1391, 1331, 1313, 1287, 1175, 1074, 1018, 970, 954, 910, 871, 845, 762, 706, 660, 601, 513 \text{ cm}^{-1}$ . **HRMS** (ESI-TOF):  $m/z$  calcd. for  $\text{C}_{10}\text{H}_{12}\text{N}_2^+$ : 161.1073  $[\text{M}+\text{H}]^+$ ; found: 161.1078. **Mass-spectra** (EI, 70 eV),  $m/z$ : 160 (13)  $[\text{M}]^+$ , 132 (3)  $[\text{M} - 2 \text{CH}_2]^+$ , 131 (29)  $[\text{M} - 2 \text{CH}_2 - \text{H}]^+$ , 118 (3)  $[\text{M} - 3 \text{CH}_2]^+$ , 117 (2)  $[\text{M} - 3 \text{CH}_2 - \text{H}]^+$ , 104 (22)  $[\text{M} - 3 \text{CH}_2 - \text{N}]^+$ , 103 (8)  $[\text{M} - 3 \text{CH}_2 - \text{N} - \text{H}]^+$ , 90 (7)  $[\text{M} - 3 \text{CH}_2 - 2 \text{N}]^+$ , 89 (13)  $[\text{M} - 3 \text{CH}_2 - 2 \text{N} - \text{H}]^+$ , 78 (4)  $[\text{C}_6\text{H}_6]^+$ , 77 (21)  $[\text{Ph}]^+$ .

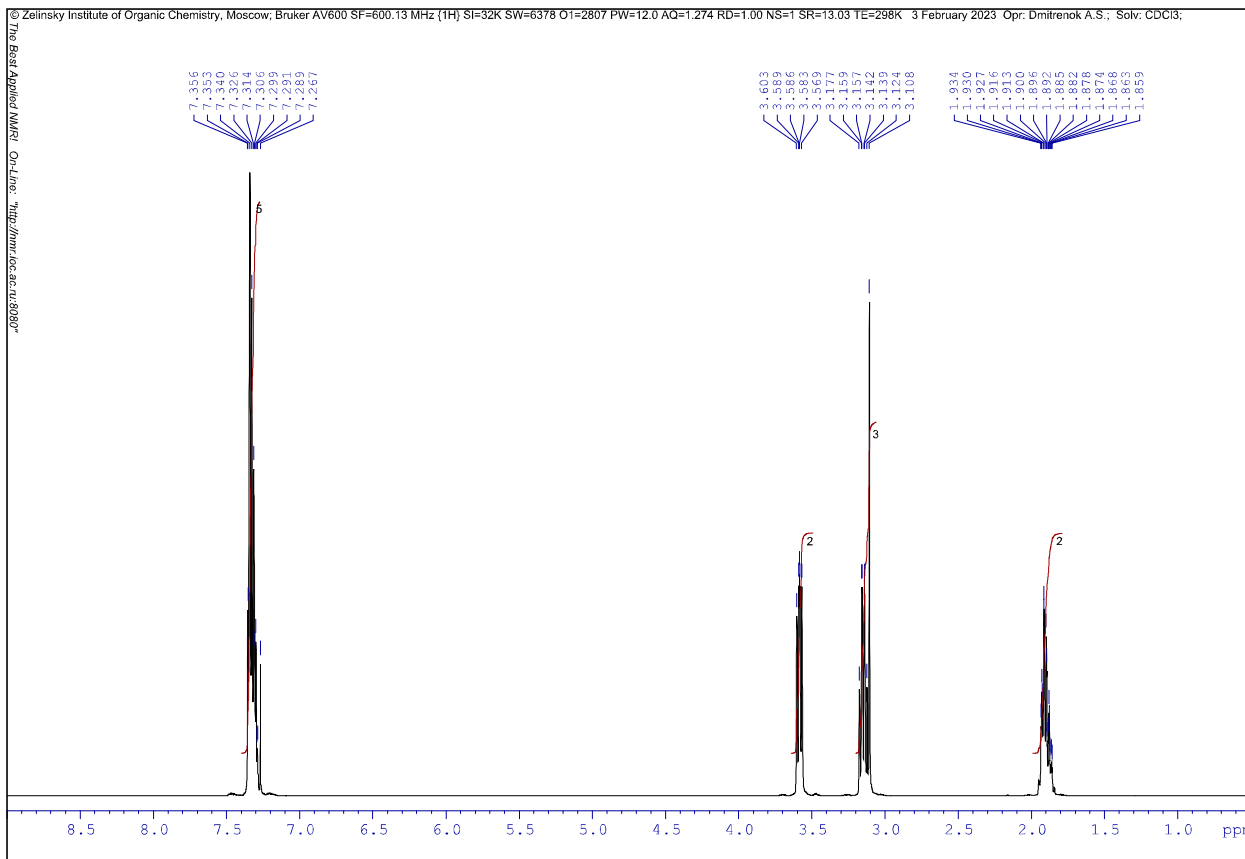

**Fig. S1** <sup>1</sup>H NMR spectrum of PDABH (CDCl<sub>3</sub>).

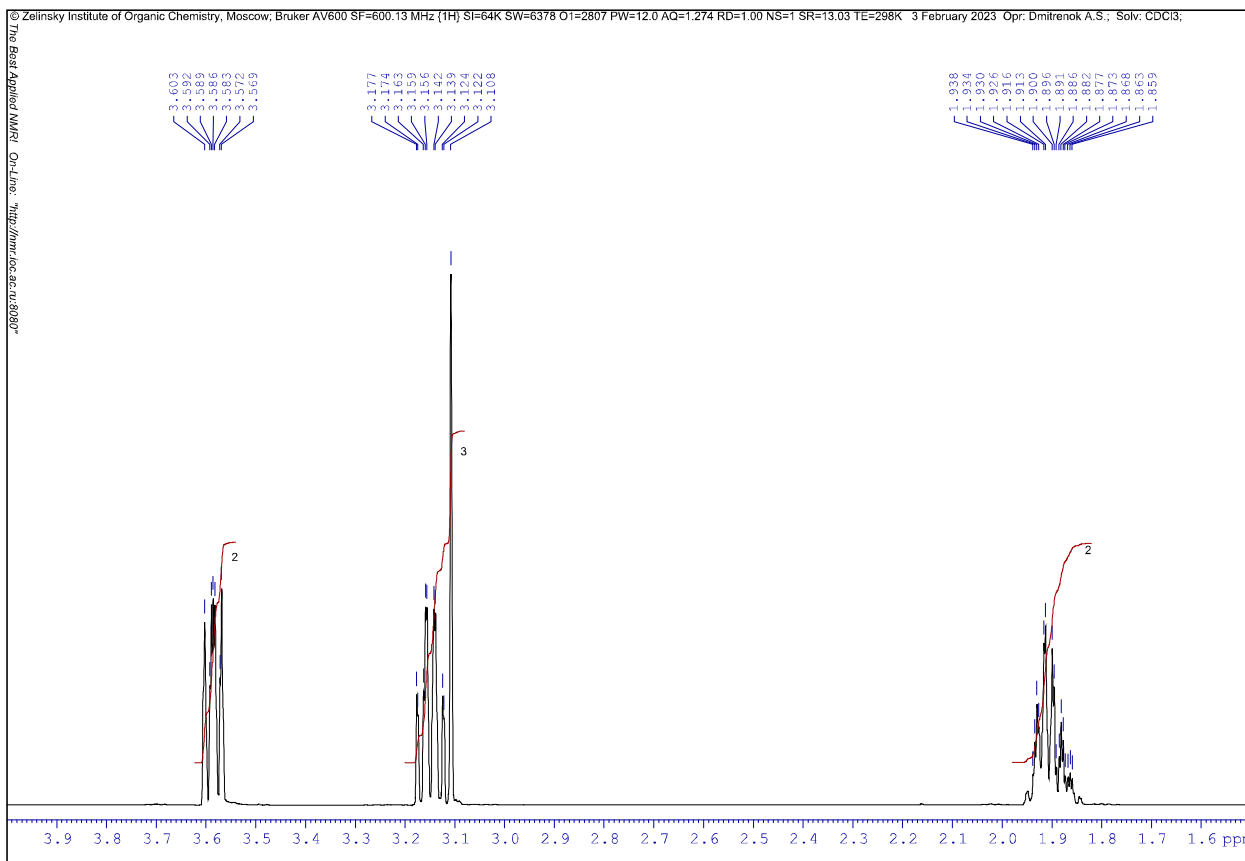

**Fig. S2** Fragment 1 of the <sup>1</sup>H NMR spectrum of PDABH (CDCl<sub>3</sub>).

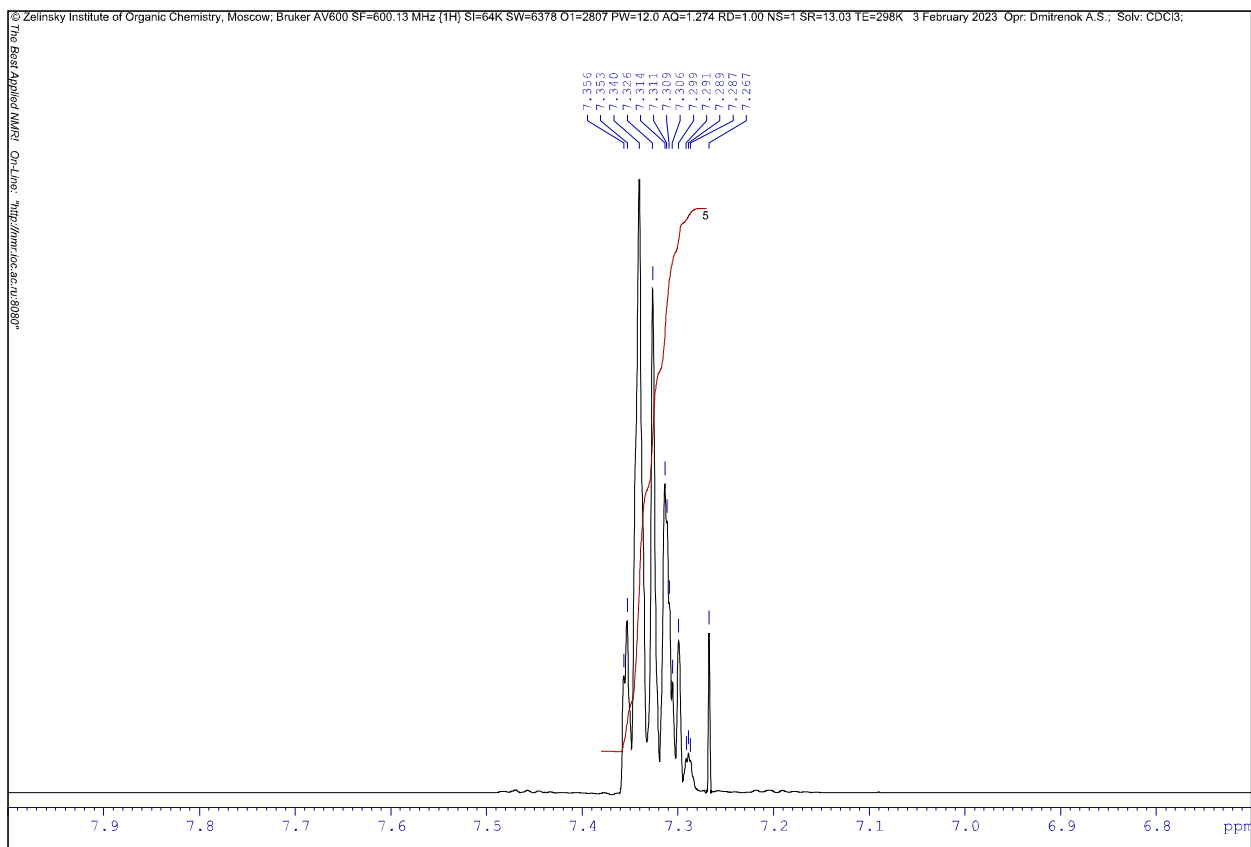

**Fig. S3** Fragment 2 of the  $^1\text{H}$  NMR spectrum of PDABH ( $\text{CDCl}_3$ ).

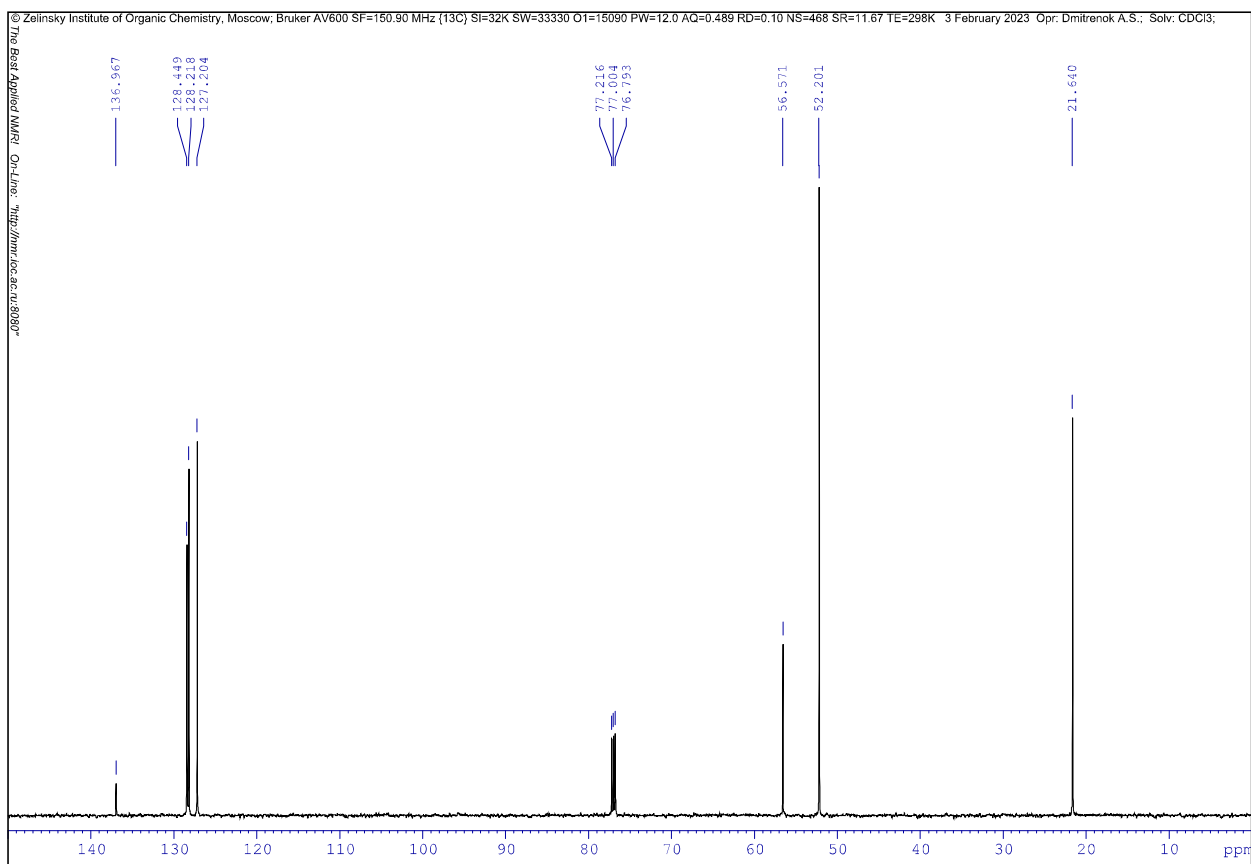

**Fig. S4**  $^{13}\text{C}$  NMR spectrum of PDABH ( $\text{CDCl}_3$ ).

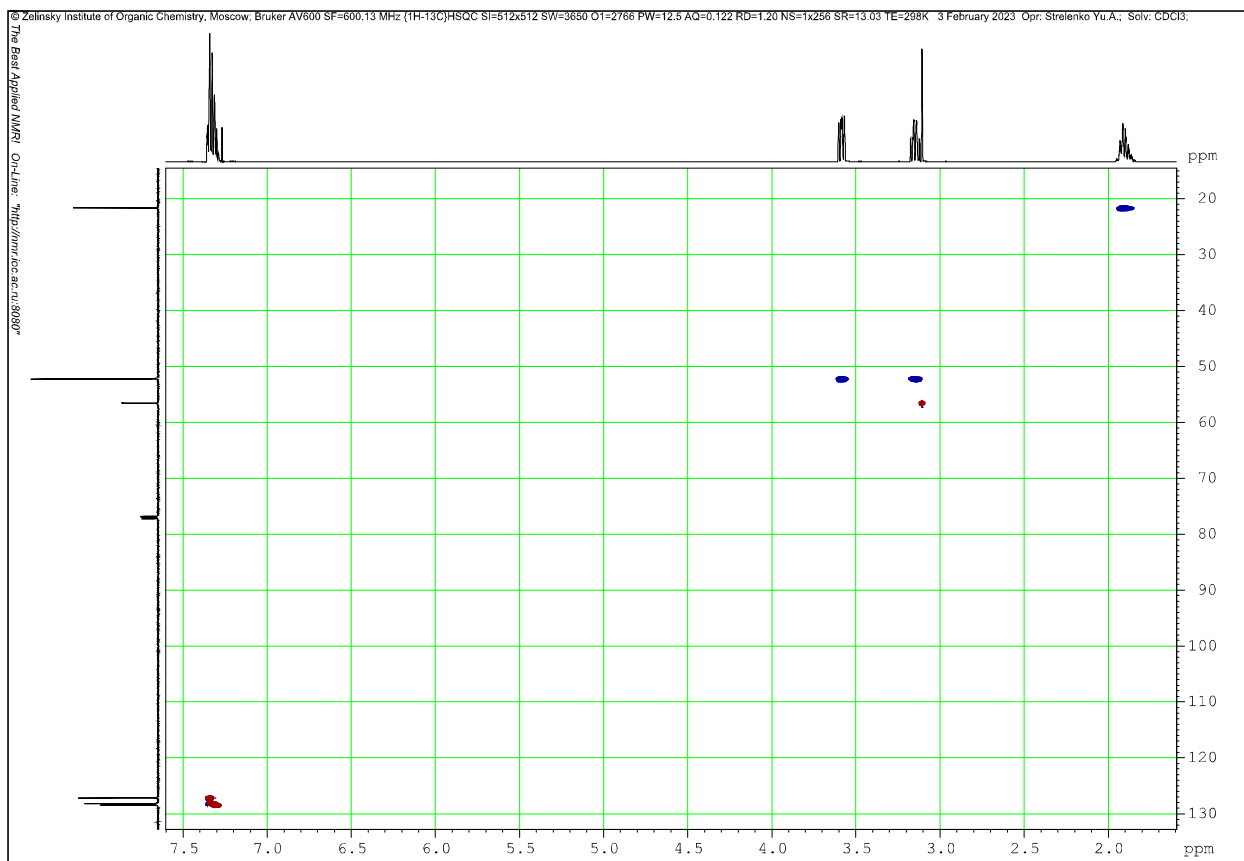

**Fig. S5**  $\{^1\text{H}-^{13}\text{C}\}$ HSQC spectrum of PDABH ( $\text{CDCl}_3$ ).

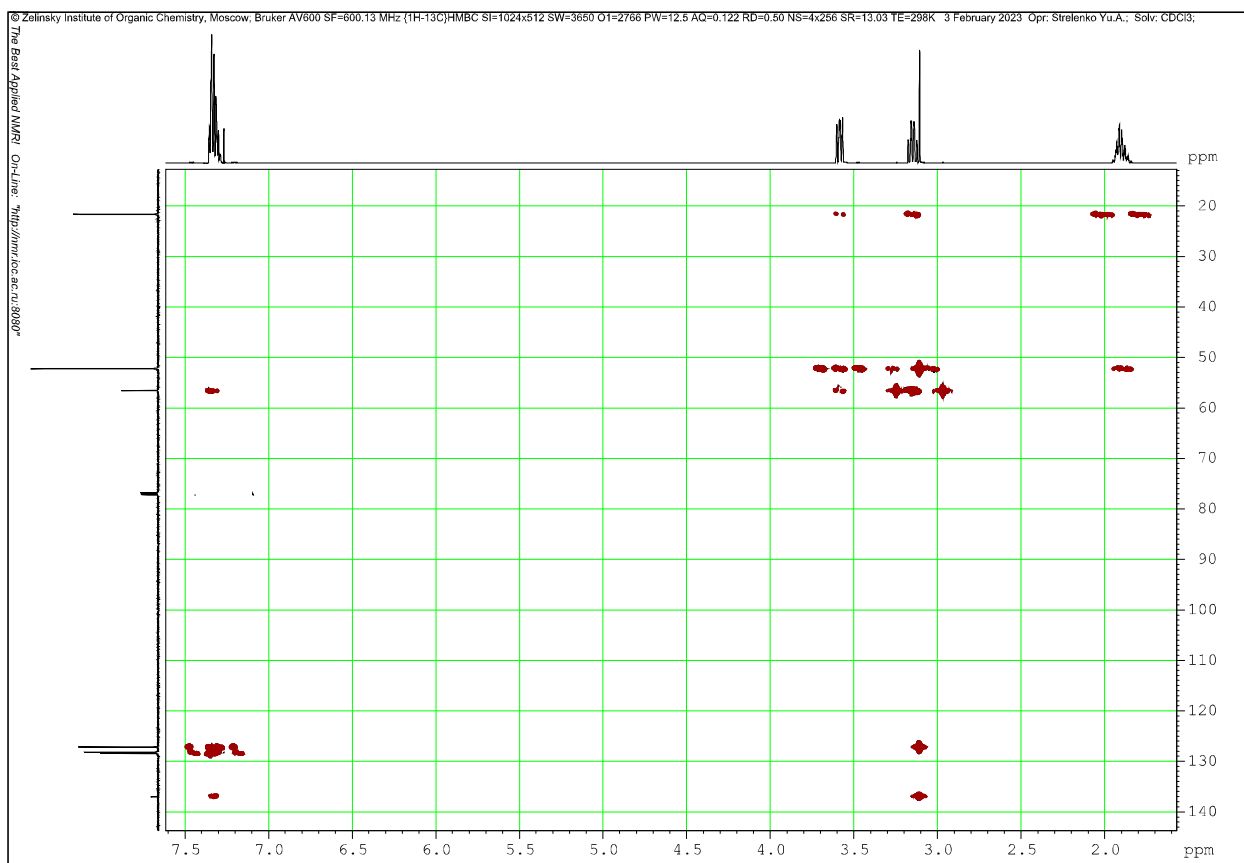

**Fig. S6**  $\{^1\text{H}-^{13}\text{C}\}$ HMBC spectrum of PDABH ( $\text{CDCl}_3$ ).

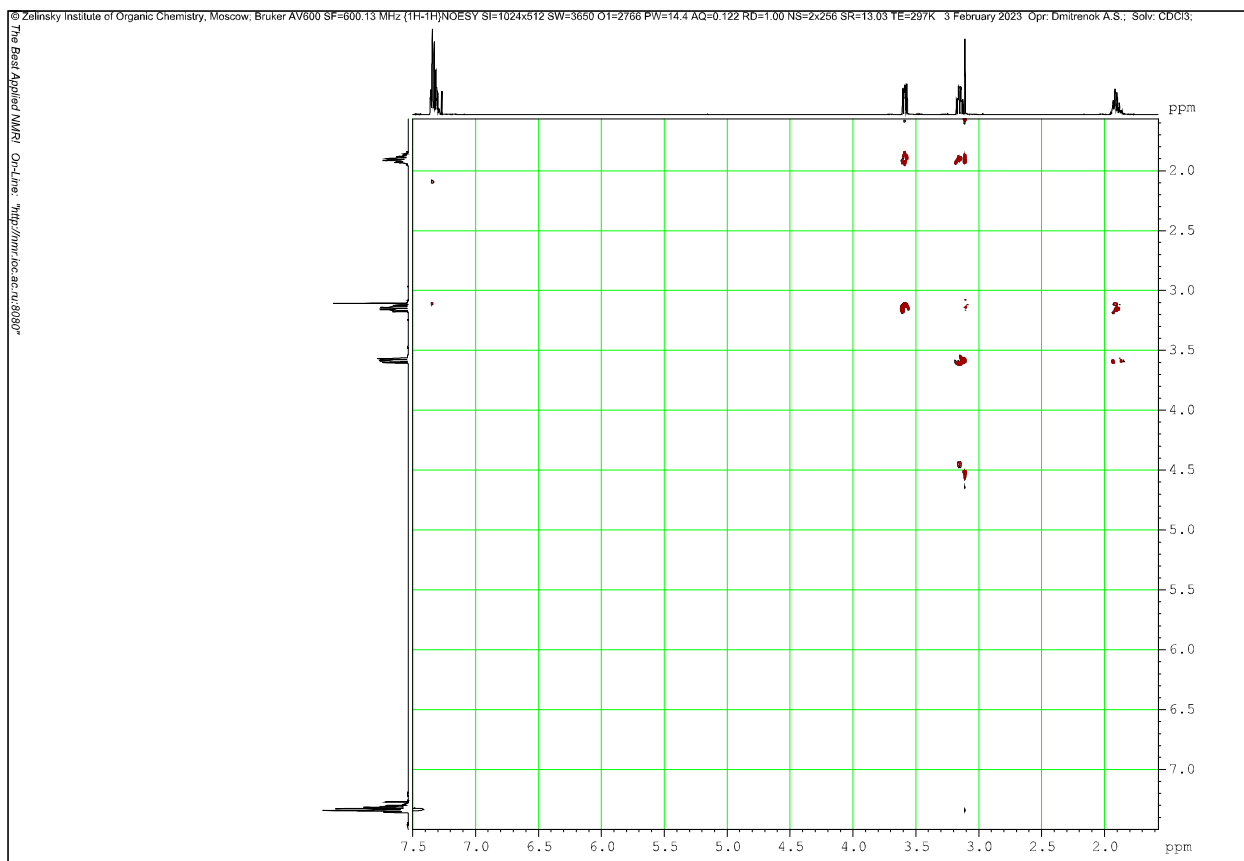

**Fig. S7**  $\{^1\text{H}-^1\text{H}\}$ gNOESY spectrum of PDABH (CDCl<sub>3</sub>).

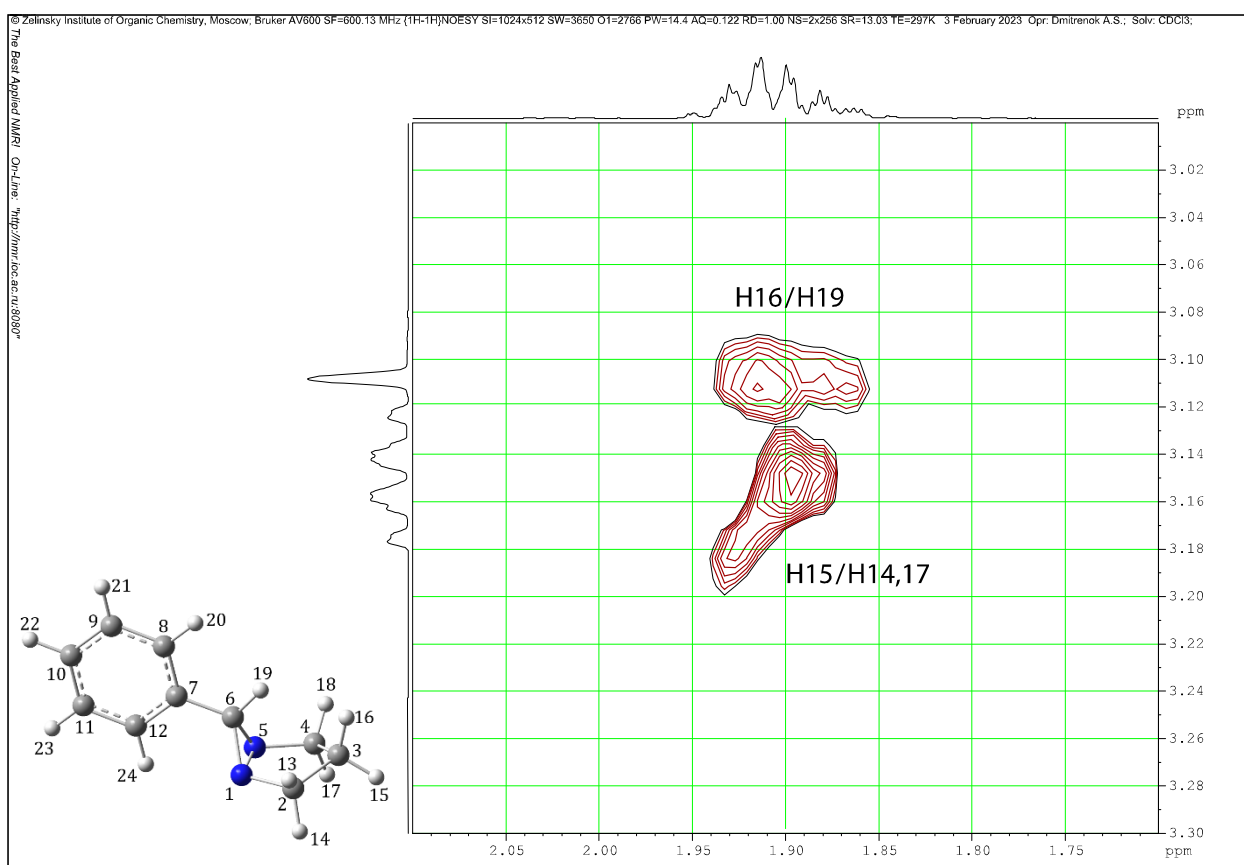

**Fig. S8** Fragment of  $\{^1\text{H}-^1\text{H}\}$ gNOESY spectrum of PDABH (CDCl<sub>3</sub>). Proton H16 has cross-peaks with proton H19. Proton H15 has cross-peaks with protons H14 and H17.

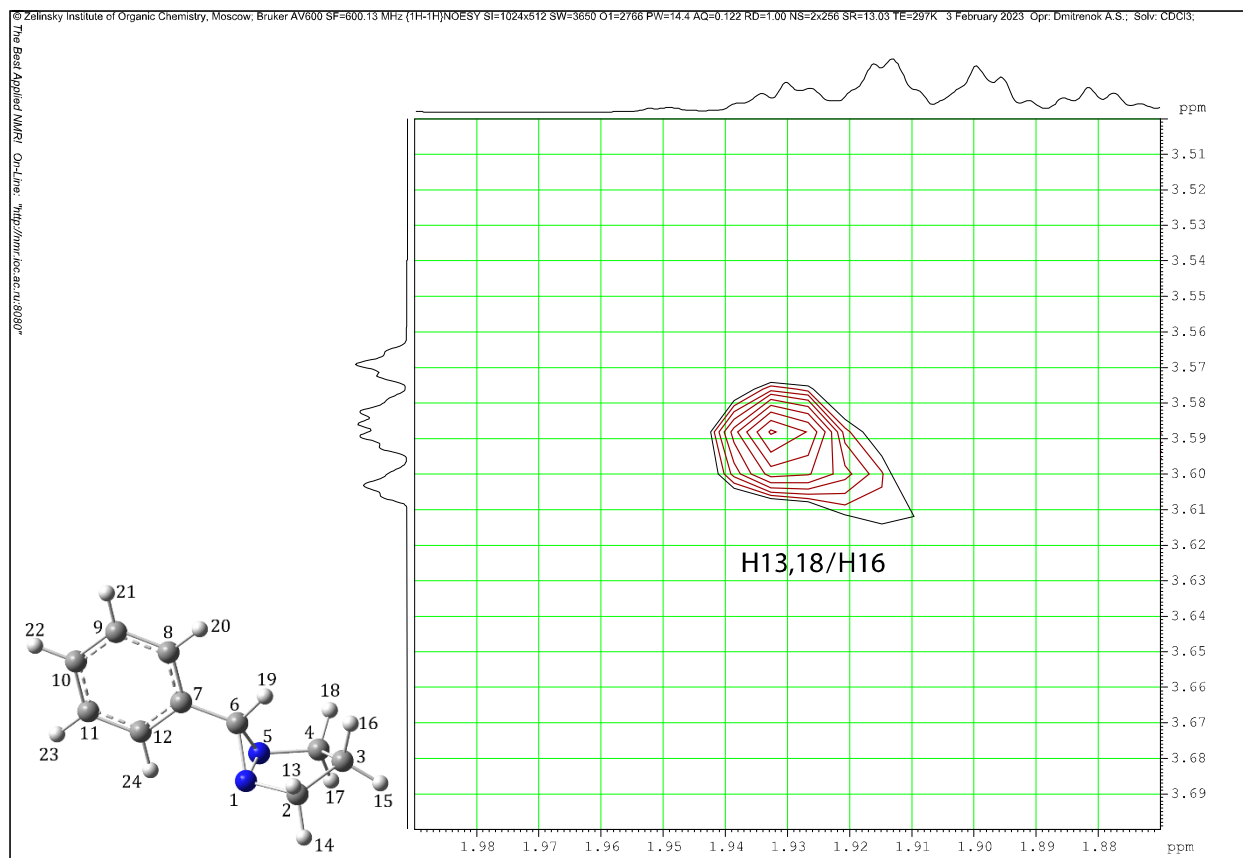

**Fig. S9** Fragment of the  $\{^1\text{H}-^1\text{H}\}$ gNOESY spectrum of PDABH ( $\text{CDCl}_3$ ). Proton H16 has cross-peaks with protons H13 and H18.

### The data of the 2D NMR spectra

**Table S1** The  $\{^1\text{H}-^{13}\text{C}\}$ HSQC, and  $\{^1\text{H}-^{13}\text{C}\}$ HMBC data for PDABH (Fig. S5, S6)

| Atom numbers | $^{13}\text{C}$ NMR chemical shift, ppm | $\{^1\text{H}-^{13}\text{C}\}$ HSQC interactions | $\{^1\text{H}-^{13}\text{C}\}$ HMBC interactions |
|--------------|-----------------------------------------|--------------------------------------------------|--------------------------------------------------|
| C2           | 52.2                                    | H13 H14                                          | H15, H16, H17, H18, H19                          |
| C3           | 21.6                                    | H15 H16                                          | H13, H14, H17, H18                               |
| C4           | 52.2                                    | H17, H18                                         | H13, H14, H15, H16, H19                          |
| C6           | 56.6                                    | H19                                              | H13, H14, H17, H18, H20, H24                     |
| C7           | 137.0                                   | -                                                | H19, H20, H24                                    |
| C8           | 127.2                                   | H20                                              | H19, H21, H22, H24                               |
| C9           | 128.2                                   | H21                                              | H20, H22, H23                                    |
| C10          | 128.4                                   | H22                                              | H20, H21, H23, H24                               |
| C11          | 128.2                                   | H23                                              | H21, H22, H24                                    |
| C12          | 127.2                                   | H24                                              | H19, H22, H23                                    |

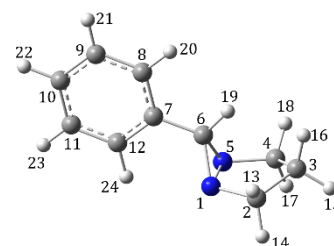



**Table S2** Partial data  $\{^1\text{H}-^1\text{H}\}$ gNOESY for PDABH (Fig. S7, S8, S9)

| Atom numbers | $^1\text{H}$ NMR chemical shift, ppm | Coupling constant, (JHz)        | $\{^1\text{H}-^1\text{H}\}$ gNOESY Interactions |
|--------------|--------------------------------------|---------------------------------|-------------------------------------------------|
| H13          | 3.56–3.61, m                         | 11.8 ( $^2J_{\text{H13-H14}}$ ) | H14, H16, H19                                   |
| H14          | 3.12–3.18, m                         | 11.8 ( $^2J_{\text{H14-H13}}$ ) | H13, H15                                        |
| H15          | 1.84–1.95, m                         | -                               | H14, H16, H17                                   |
| H16          | 1.84–1.95, m                         | -                               | H13, H15, H18, H19                              |
| H17          | 3.12–3.18, m                         | 11.8 ( $^2J_{\text{H17-H18}}$ ) | H15, H18                                        |
| H18          | 3.56–3.61, m                         | 11.8 ( $^2J_{\text{H18-H17}}$ ) | H16, H17, H19                                   |
| H19          | 3.11, s                              | -                               | H13, H16, H18                                   |

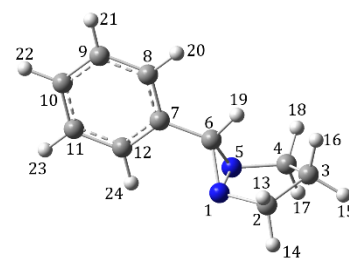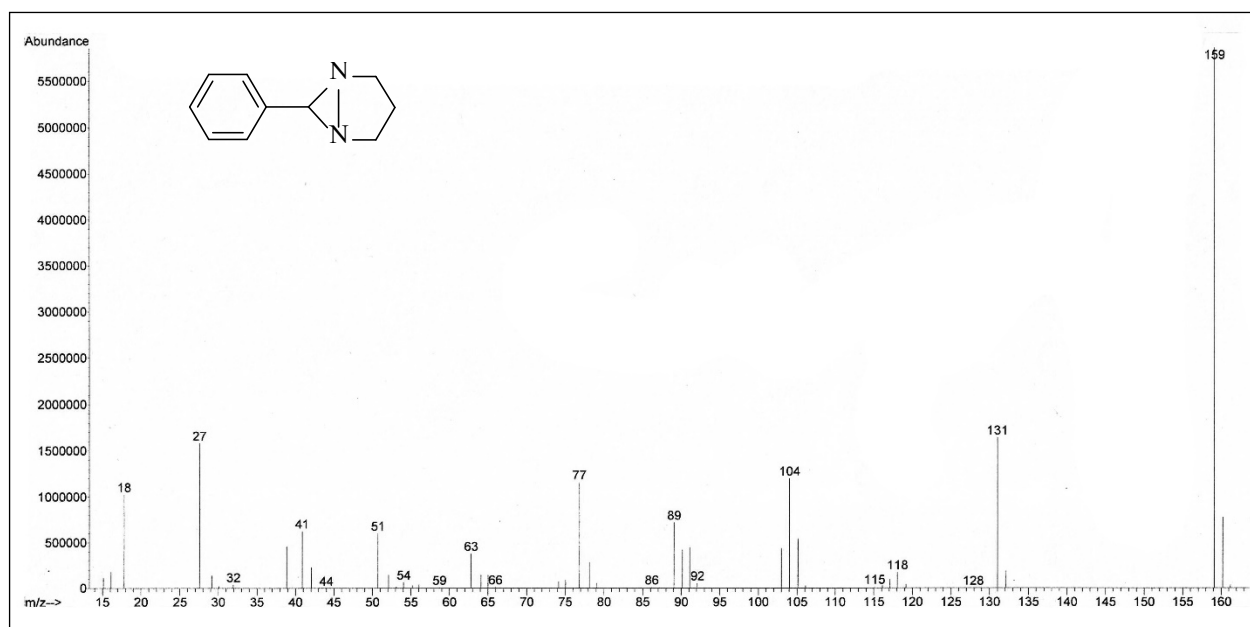**Fig. S10** Mass spectrum of PDABH.

## S2 Melting characteristics of PDABH investigated by differential scanning calorimetry (DSC)

**General remarks.** Thermal analysis was carried out on DSC 204 F1 Phoenix ® differential scanning calorimeter (NETZSCH, Selb, Germany) and TG 209 F1 Libra ® thermobalances (NETZSCH, Selb, Germany). Samples weighing 1.00–10.00 mg were tested in aluminum (DSC) and alumina (TG) crucibles (lid with a hole) under dry nitrogen flow (20–70 mL·min<sup>-1</sup>) with a heating rate of 0.5 °C·min<sup>-1</sup> for DSC and 10 °C·min<sup>-1</sup> for TG measurements. Instruments were previously calibrated for temperatures and enthalpies of phase transitions of pure (99.99+ %) standard substances in compliance with ASTM Practices E967, E968, E1582, and E2253: cyclohexane, adamantane, Hg,

H<sub>2</sub>O, benzoic acid, In, Sn, Bi, Pb, Zn, CsCl – for DSC; In, Sn, Bi, Zn, Al, Ag, Au – for TG. Calcium oxalate monohydrate was used for the validation of thermobalances. RMSD for temperature, heat effect and mass determination were 0.2 °C, 5 % and 0.2 %, correspondingly. Experimental data were processed in NETZSCH Proteus ® Software according to ASTM E794, E2550, and ISO 11357-1.

Substance purity was determined by DSC according to ASTM E928 procedure. Sample was ramped at 0.5 °C·min<sup>-1</sup> from 358 to 368 K. Experimental DSC signal was additionally corrected on thermal lag to obtain actual sample temperature. Thermal resistance constant was obtained from the melting curve of a high purity (99.999 %) indium standard. The melting temperature of PDABH is 365.85 ± 0.2 K (92.70 °C); the melting enthalpy is 22763.50 J·mol<sup>-1</sup> (142.08 J·g<sup>-1</sup>); the purity is 99.94 mol.%.

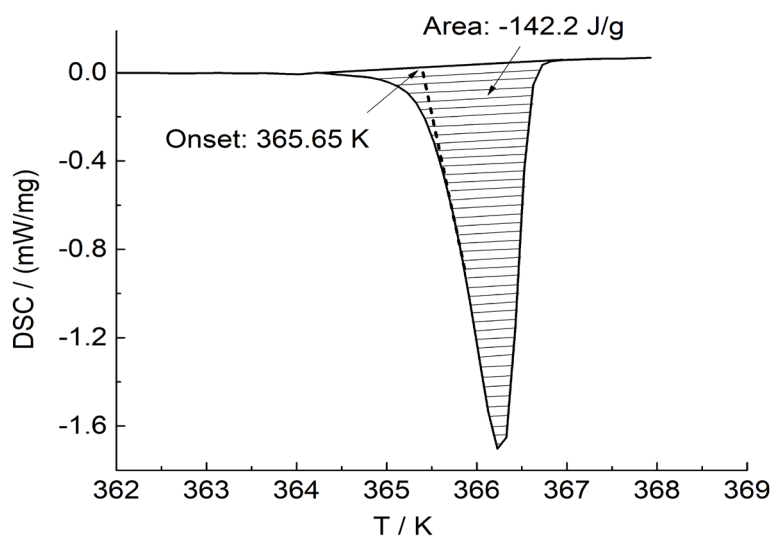

**Fig. S11** DSC curve of PDABH.

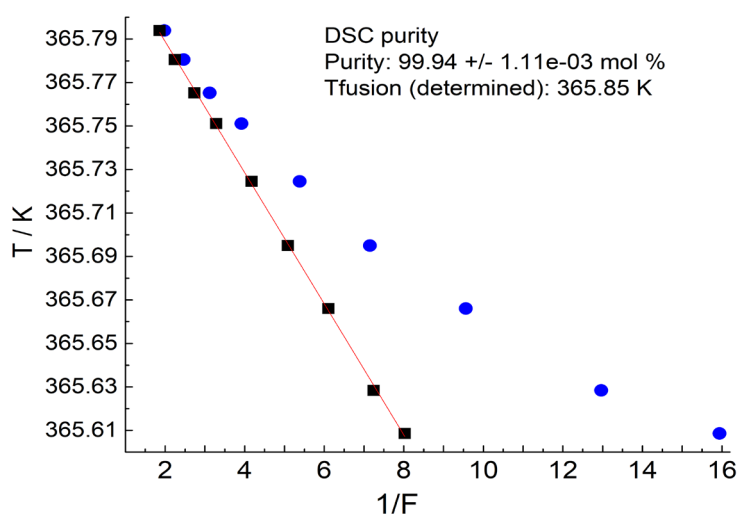

**Fig. S12** The results for the fractional melting of the PDABH sample: equilibrium temperature of PDABH sample melting  $T$  vs  $1/F$ , where  $1/F$  is the reciprocal fraction of the sample melted.

### S3 Theoretical calculations

**Table S3** Cartesian coordinates of PDABH molecule optimized at B3LYP-D3(BJ)/def2-TZVPP level.

|                                                                                                                    |           |           |           |           |
|--------------------------------------------------------------------------------------------------------------------|-----------|-----------|-----------|-----------|
| 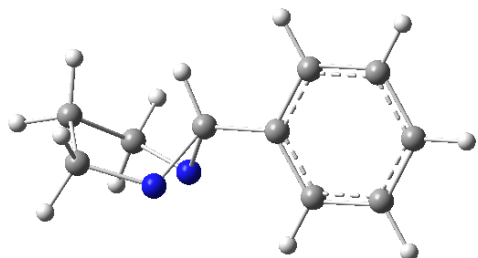 <p><math>C_s</math> symmetry</p> | C         | 0.743594  | -3.311469 | 0.000000  |
|                                                                                                                    | C         | 1.141767  | -2.434628 | 1.197049  |
|                                                                                                                    | C         | -0.050866 | -0.671503 | 0.000000  |
|                                                                                                                    | C         | 1.141767  | -2.434628 | -1.197049 |
|                                                                                                                    | H         | 0.473530  | -2.538932 | 2.051745  |
|                                                                                                                    | H         | 2.155241  | -2.658107 | 1.529813  |
|                                                                                                                    | H         | 2.155241  | -2.658107 | -1.529813 |
|                                                                                                                    | H         | -0.322860 | -3.528787 | 0.000000  |
|                                                                                                                    | H         | -0.865238 | -1.390786 | 0.000000  |
|                                                                                                                    | H         | 0.473530  | -2.538932 | -2.051745 |
|                                                                                                                    | H         | 1.267253  | -4.265181 | 0.000000  |
|                                                                                                                    | N         | 1.141767  | -1.029557 | -0.746316 |
|                                                                                                                    | N         | 1.141767  | -1.029557 | 0.746316  |
|                                                                                                                    | C         | -0.500846 | 0.740523  | 0.000000  |
|                                                                                                                    | C         | -1.861592 | 1.035381  | 0.000000  |
|                                                                                                                    | C         | 0.424756  | 1.783729  | 0.000000  |
|                                                                                                                    | C         | -2.298588 | 2.355194  | 0.000000  |
|                                                                                                                    | H         | -2.583876 | 0.228044  | 0.000000  |
|                                                                                                                    | C         | -0.010884 | 3.100409  | 0.000000  |
|                                                                                                                    | H         | 1.478759  | 1.547122  | 0.000000  |
| C                                                                                                                  | -1.372692 | 3.390363  | 0.000000  |           |
| H                                                                                                                  | -3.358145 | 2.573141  | 0.000000  |           |
| H                                                                                                                  | 0.711877  | 3.905445  | 0.000000  |           |
| H                                                                                                                  | -1.708539 | 4.418654  | 0.000000  |           |

**Table S4** Enthalpies of formation of reference species used in working reactions and DLPNO-CCSD(T1)/CBS energies, ZPEs and enthalpic corrections for the compounds studied

| Molecule                                       | $\Delta_f H_m^\circ(298.15\text{ K})$<br>kJ·mol <sup>-1</sup>   | Ref.           | $E_c^a$<br>Hartree | ZPE <sup>b</sup><br>Hartree | $(H_{298}^\circ - H_0^\circ)^b$<br>Hartree |          |
|------------------------------------------------|-----------------------------------------------------------------|----------------|--------------------|-----------------------------|--------------------------------------------|----------|
| CH <sub>4</sub>                                | CH <sub>4</sub>                                                 | -74.52 ± 0.05  | [1]                | -40.459037                  | 0.044078                                   | 0.003815 |
| CH <sub>4</sub> N <sub>2</sub>                 | Diaziridine                                                     | 235.3 ± 1.0    | [2]                | -149.770578                 | 0.058280                                   | 0.004106 |
| CH <sub>4</sub> N <sub>2</sub> O               | NH <sub>2</sub> C(O)NH <sub>2</sub>                             | -234.58 ± 0.42 | [1]                | -225.053499                 | 0.062842                                   | 0.005416 |
| CH <sub>4</sub> O                              | CH <sub>3</sub> OH                                              | -200.92 ± 0.15 | [1]                | -115.612461                 | 0.050500                                   | 0.004315 |
| CH <sub>5</sub> N                              | CH <sub>3</sub> NH <sub>2</sub>                                 | -21.25 ± 0.23  | [1]                | -95.747147                  | 0.063085                                   | 0.004399 |
| CH <sub>6</sub> N <sub>2</sub>                 | CH <sub>3</sub> NHNH <sub>2</sub>                               | 94.6 ± 0.6     | [3]                | -151.010035                 | 0.080428                                   | 0.005173 |
| C <sub>2</sub> H <sub>4</sub>                  | CH <sub>2</sub> =CH <sub>2</sub>                                | 52.38 ± 0.12   | [1]                | -78.476121                  | 0.050365                                   | 0.003992 |
| C <sub>2</sub> H <sub>4</sub> O                | Oxirane                                                         | -52.51 ± 0.35  | [1]                | -153.620407                 | 0.056602                                   | 0.004115 |
| C <sub>2</sub> H <sub>5</sub> N                | Aziridine                                                       | 126.72 ± 0.89  | [1]                | -133.755511                 | 0.069290                                   | 0.004203 |
| C <sub>2</sub> H <sub>6</sub>                  | CH <sub>3</sub> CH <sub>3</sub>                                 | -84.02 ± 0.12  | [1]                | -79.714152                  | 0.073581                                   | 0.004446 |
| C <sub>2</sub> H <sub>7</sub> N                | CH <sub>3</sub> NHCH <sub>3</sub>                               | -17.43 ± 0.40  | [1]                | -134.995366                 | 0.091038                                   | 0.005386 |
| C <sub>2</sub> H <sub>7</sub> N                | CH <sub>3</sub> CH <sub>2</sub> NH <sub>2</sub>                 | -49.88 ± 0.46  | [1]                | -135.008537                 | 0.091372                                   | 0.005386 |
| C <sub>2</sub> H <sub>8</sub> N <sub>2</sub>   | (CH <sub>3</sub> ) <sub>2</sub> NNH <sub>2</sub>                | 83.8 ± 2.5     | [3]                | -190.263407                 | 0.107525                                   | 0.006302 |
| C <sub>3</sub> H <sub>6</sub>                  | Cyclopropane                                                    | 53.88 ± 0.38   | [1]                | -117.726834                 | 0.080232                                   | 0.004335 |
| C <sub>3</sub> H <sub>6</sub>                  | CH <sub>2</sub> =CHCH <sub>3</sub>                              | 20.02 ± 0.19   | [1]                | -117.738879                 | 0.078566                                   | 0.005049 |
| C <sub>3</sub> H <sub>6</sub> O                | CH <sub>3</sub> C(O)CH <sub>3</sub>                             | -216.93 ± 0.27 | [1]                | -192.931964                 | 0.082345                                   | 0.006386 |
| C <sub>3</sub> H <sub>8</sub>                  | CH <sub>3</sub> CH <sub>2</sub> CH <sub>3</sub>                 | -105.00 ± 0.16 | [1]                | -118.972715                 | 0.101930                                   | 0.005501 |
| C <sub>4</sub> H <sub>4</sub> N <sub>2</sub>   | Pyrazine                                                        | 203.2 ± 1.5    | [4]                | -263.977808                 | 0.075874                                   | 0.005141 |
| C <sub>4</sub> H <sub>5</sub> N                | 1 <i>H</i> -Pyrrole                                             | 108.2 ± 0.8    | [5]                | -209.893602                 | 0.081534                                   | 0.004935 |
| C <sub>4</sub> H <sub>8</sub> N <sub>2</sub>   | 1,5-Diazabicyclo[3.1.0]-<br>hexane                              | 252.7 ± 2.1    | [2]                | -266.330395                 | 0.120986                                   | 0.005940 |
| C <sub>4</sub> H <sub>10</sub>                 | CH <sub>3</sub> CH <sub>2</sub> CH <sub>2</sub> CH <sub>3</sub> | -125.64 ± 0.24 | [1]                | -158.231393                 | 0.130089                                   | 0.006770 |
| C <sub>4</sub> H <sub>10</sub> N <sub>2</sub>  | Piperazine                                                      | 26.7 ± 2.1     | [6]                | -263.977808                 | 0.075874                                   | 0.005141 |
| C <sub>5</sub> H <sub>8</sub> N <sub>2</sub>   | 2,3-Diazabicyclo[2.2.1]-<br>hept-2-ene                          | 207.4 ± 2.7    | [7]                | -304.413227                 | 0.127701                                   | 0.005996 |
| C <sub>5</sub> H <sub>10</sub>                 | Cyclopentane                                                    | -76.25 ± 0.41  | [1]                | -196.279351                 | 0.138737                                   | 0.006205 |
| C <sub>5</sub> H <sub>11</sub> N               | Piperidine                                                      | -48.8 ± 2.6    | [8]                | -251.575993                 | 0.157001                                   | 0.006559 |
| C <sub>6</sub> H <sub>6</sub>                  | Benzene                                                         | 83.23 ± 0.22   | [1]                | -231.913115                 | 0.099307                                   | 0.005369 |
| C <sub>6</sub> H <sub>10</sub>                 | Bicyclo[3.1.0]hexane                                            | 38.6 ± 2.1     | [9]                | -234.301157                 | 0.144559                                   | 0.006163 |
| C <sub>6</sub> H <sub>12</sub>                 | Cyclohexane                                                     | -122.76 ± 0.29 | [1]                | -235.547997                 | 0.168052                                   | 0.006705 |
| C <sub>6</sub> H <sub>12</sub> N <sub>2</sub>  | 1,2-Diazaspiro[2.5]octane                                       |                |                    | -344.879851                 | 0.179190                                   | 0.008119 |
| C <sub>6</sub> H <sub>12</sub> N <sub>4</sub>  | Hexamethylenetetramine                                          | 203.7 ± 0.8    | [10]               | -454.283612                 | 0.195771                                   | 0.007222 |
| C <sub>7</sub> H <sub>10</sub>                 | Norbornene                                                      | 82.6 ± 2.1     | [11]               | -272.349731                 | 0.150989                                   | 0.006221 |
| C <sub>7</sub> H <sub>12</sub>                 | Norbornane                                                      | -53.6 ± 1.9    | [12]               | -273.588519                 | 0.174686                                   | 0.006641 |
| C <sub>8</sub> H <sub>14</sub> N <sub>2</sub>  | 1,4-Dimethyl-2,3-diaza-<br>bicyclo[2.2.2]octene-2               | 92.4 ± 4.4     | [74]               | -422.209357                 | 0.210686                                   | 0.010247 |
| C <sub>10</sub> H <sub>9</sub> N               | 1-Phenylpyrrole                                                 | 226.4 ± 2.4    | [13]               | -440.610749                 | 0.161462                                   | 0.009249 |
| C <sub>10</sub> H <sub>12</sub> N <sub>2</sub> | 6-Phenyl-1,5-diaza-<br>bicyclo[3.1.0]hexane                     |                |                    | -497.059069                 | 0.200852                                   | 0.010569 |
| C <sub>10</sub> H <sub>16</sub>                | Adamantane                                                      | -132.3 ± 2.2   | [14]               | -390.187355                 | 0.240709                                   | 0.008002 |
| C <sub>12</sub> H <sub>10</sub>                | Biphenyl                                                        | 179.7 ± 1.1    | [15]               | -462.639154                 | 0.179473                                   | 0.009352 |
| H <sub>2</sub> N <sub>2</sub>                  | NH=NH                                                           | 199.98 ± 0.41  | [1]                | -110.532016                 | 0.028000                                   | 0.003802 |
| H <sub>3</sub> N                               | NH <sub>3</sub>                                                 | -45.56 ± 0.03  | [1]                | -56.505222                  | 0.033840                                   | 0.003816 |
| H <sub>3</sub> NO                              | NH <sub>2</sub> OH                                              | -43.45 ± 0.42  | [1]                | -131.608580                 | 0.039777                                   | 0.004171 |
| H <sub>4</sub> N <sub>2</sub>                  | NH <sub>2</sub> NH <sub>2</sub>                                 | 97.57 ± 0.42   | [1]                | -111.758846                 | 0.052628                                   | 0.004227 |

<sup>a</sup> DLPNO-CCSD(T<sub>1</sub>)/CBS//B3LYP-D3(BJ)/def2-TZVPP single point energy.

<sup>b</sup> Calculated at B3LYP-D3(BJ)/def2-TZVPP level; ZPEs and  $(H_{298}^\circ - H_0^\circ)$  corrections are calculated using vibrational frequencies scaled by 0.9883.

## References

- [1] B. Ruscic, D.H. Bross, Active Thermochemical Tables (ATcT), Version 1.124: Argonne National Laboratory, 2022, <http://atct.anl.gov/> (accessed May 25, 2023).
- [2] Calculation, this work; see Table 4.

- [3] J.D. Cox, G. Pilcher, *Thermochemistry of Organic and Organometallic Compounds*, Academic Press, New York 1970.
- [4] S.P. Verevkin, V.N. Emel'yanenko, R. Notario, M.V. Roux, J.S. Chickos, J.F. Liebman, *J. Phys. Chem. Lett.* 3 (2012) 3454–3459.
- [5] A. Das, M. Frenkel, N.A.M., Gadalla, S. Kudchadker, K.N. Marsh, A.S. Rodgers, R.C. Wilhoit, *J. Phys. Chem. Ref. Data* 22 (1993) 659–780.
- [6] O.V. Dorofeeva, M.A. Filimonova, *J. Chem. Thermodyn.* 145 (2020) 106092.
- [7] P.S. Engel, R.A. Melaugh, M. Månsson, J. W. Timberlake, A.W. Garner, F.D. Rossini, *J. Chem. Thermodyn.* 8 (1976) 607–621.
- [8] A.F. Bedford, A.E. Beezer, C.T. Mortimer, *J. Chem. Soc.*, 1963, 2039-2043.
- [9] V.P. Kolesov, S.M. Pimenova, V.A. Lukyanova, T.S. Kuznetsova, M.P. Kozina, *J. Chem. Thermodyn.* 30 (1998) 1455–1464.
- [10] S.P. Verevkin, *J. Chem. Thermodyn.* 34 (2002) 263–275.
- [11] W.V. Steele, R.D. Chirico, S.E. Knipmeyer, A. Nguyen, N.K. Smith, *J. Chem. Eng. Data* 41 (1996) 1285–1302.
- [12] S.P. Verevkin, V.N. Emel'yanenko, *J. Phys. Chem. A* 108 (2004) 6575–6580.
- [13] A.F.L.O.M. Santos, M.A.V. Ribeiro da Silva, *J. Chem. Thermodyn.* 42 (2010) 734–741.
- [14] A.B. Bazyleva, A.V. Blokhin, G.J. Kabo, M.B. Charapennikau, V.N. Emel'yanenko, S.P. Verevkin, V. Diky, *J. Phys. Chem. B* 115 (2011) 10064–10072.
- [15] D.H. Zaitsau, V.N. Emel'yanenko, A.A. Pimerzin, S.P. Verevkin, *J. Chem. Thermodyn.* 122 (2018) 1–12.

**Table S5** Enthalpies of formation of PDABH and some related compounds calculated by DLPNO-CCSD(T<sub>1</sub>)/CBS//B3LYP-D3(BJ)/def2-TZVPP and G4 methods using different working reactions (in kJ/mol at  $T=298.15$  K)

| Reactions for a given compound                                                                                                                                                                                                                       | Experiment           |           | Calculation                                |                                                                         |
|------------------------------------------------------------------------------------------------------------------------------------------------------------------------------------------------------------------------------------------------------|----------------------|-----------|--------------------------------------------|-------------------------------------------------------------------------|
|                                                                                                                                                                                                                                                      | $\Delta_f H_m^\circ$ | Reference | DLPNO<br>$\Delta_f H_m^\circ$ <sup>a</sup> | Exp. – Calc.<br>G4<br>$\Delta_f H_m^\circ$ <sup>a</sup><br>Exp. – Calc. |
| C <sub>10</sub> H <sub>12</sub> N <sub>2</sub> 6-Phenyl-1,5-diazabicyclo[3.1.0]hexane<br>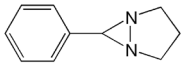                                                                           |                      |           |                                            |                                                                         |
| Atomization reaction                                                                                                                                                                                                                                 |                      |           |                                            | 334.1                                                                   |
| 1 C <sub>10</sub> H <sub>12</sub> N <sub>2</sub> + 6 CH <sub>4</sub> → 3 C <sub>2</sub> H <sub>6</sub> + 2 C <sub>2</sub> H <sub>4</sub> + C <sub>6</sub> H <sub>6</sub> + NH <sub>2</sub> NH <sub>2</sub>                                           |                      |           | 343.6                                      | 327.0                                                                   |
| 2 C <sub>10</sub> H <sub>12</sub> N <sub>2</sub> + 6 CH <sub>4</sub> → 4 C <sub>2</sub> H <sub>6</sub> + C <sub>2</sub> H <sub>4</sub> + C <sub>6</sub> H <sub>6</sub> + NH=NH                                                                       |                      |           | 342.7                                      | 329.0                                                                   |
| 3 C <sub>10</sub> H <sub>12</sub> N <sub>2</sub> + 8 CH <sub>4</sub> → 4 C <sub>2</sub> H <sub>6</sub> + 2 C <sub>2</sub> H <sub>4</sub> + C <sub>6</sub> H <sub>6</sub> + 2 NH <sub>3</sub>                                                         |                      |           | 343.3                                      | 323.1                                                                   |
| 4 C <sub>10</sub> H <sub>12</sub> N <sub>2</sub> + 6 CH <sub>4</sub> → 2 C <sub>2</sub> H <sub>6</sub> + 2 C <sub>2</sub> H <sub>4</sub> + C <sub>6</sub> H <sub>6</sub> + 2 CH <sub>3</sub> NH <sub>2</sub>                                         |                      |           | 343.3                                      | 327.4                                                                   |
| 5 C <sub>10</sub> H <sub>12</sub> N <sub>2</sub> + 6 CH <sub>4</sub> + CH <sub>3</sub> C(O)CH <sub>3</sub> → 4 C <sub>2</sub> H <sub>6</sub> + 2 C <sub>2</sub> H <sub>4</sub> + C <sub>6</sub> H <sub>6</sub> + NH <sub>2</sub> C(O)NH <sub>2</sub> |                      |           | 344.3                                      | 327.6                                                                   |
| 6 C <sub>10</sub> H <sub>12</sub> N <sub>2</sub> + C <sub>3</sub> H <sub>6</sub> (cyclopropane) + 2 CH <sub>4</sub> → 2 C <sub>2</sub> H <sub>5</sub> N (aziridine) + C <sub>5</sub> H <sub>10</sub> (cyclopentane) + C <sub>6</sub> H <sub>6</sub>  |                      |           | 341.6                                      | 327.0                                                                   |
| 7 C <sub>10</sub> H <sub>12</sub> N <sub>2</sub> + 5 CH <sub>4</sub> → 3 C <sub>2</sub> H <sub>6</sub> + C <sub>2</sub> H <sub>4</sub> + C <sub>6</sub> H <sub>6</sub> + CH <sub>4</sub> N <sub>2</sub> (diaziridine)                                |                      |           | 342.9                                      | 329.0                                                                   |
| 8 C <sub>10</sub> H <sub>12</sub> N <sub>2</sub> + 5 CH <sub>4</sub> → 2 C <sub>2</sub> H <sub>6</sub> + 2 C <sub>2</sub> H <sub>4</sub> + C <sub>6</sub> H <sub>6</sub> + CH <sub>3</sub> NHNH <sub>2</sub>                                         |                      |           | 343.5                                      | 329.8                                                                   |
| 9 C <sub>10</sub> H <sub>12</sub> N <sub>2</sub> + 4 CH <sub>4</sub> → C <sub>2</sub> H <sub>6</sub> + 2 C <sub>2</sub> H <sub>4</sub> + C <sub>6</sub> H <sub>6</sub> + (CH <sub>3</sub> ) <sub>2</sub> NNH <sub>2</sub>                            |                      |           | 342.6                                      | 332.2                                                                   |
| 10 C <sub>10</sub> H <sub>12</sub> N <sub>2</sub> + 2 CH <sub>4</sub> → C <sub>6</sub> H <sub>10</sub> (bicyclo[3.1.0]hexane) + C <sub>6</sub> H <sub>6</sub> + NH <sub>2</sub> NH <sub>2</sub>                                                      |                      |           | 344.9                                      | 330.8                                                                   |
| 11 C <sub>10</sub> H <sub>12</sub> N <sub>2</sub> + CH <sub>4</sub> + C <sub>2</sub> H <sub>4</sub> → C <sub>6</sub> H <sub>10</sub> (bicyclo[3.1.0]hexane) + C <sub>6</sub> H <sub>6</sub> + CH <sub>4</sub> N <sub>2</sub> (diaziridine)           |                      |           | 344.2                                      | 332.8                                                                   |
| 12 C <sub>10</sub> H <sub>12</sub> N <sub>2</sub> + CH <sub>4</sub> + C <sub>2</sub> H <sub>6</sub> → C <sub>6</sub> H <sub>10</sub> (bicyclo[3.1.0]hexane) + C <sub>6</sub> H <sub>6</sub> + CH <sub>3</sub> NHNH <sub>2</sub>                      |                      |           | 344.8                                      | 333.6                                                                   |
| 13 C <sub>10</sub> H <sub>12</sub> N <sub>2</sub> + 2 C <sub>2</sub> H <sub>6</sub> → C <sub>6</sub> H <sub>10</sub> (bicyclo[3.1.0]hexane) + C <sub>6</sub> H <sub>6</sub> + (CH <sub>3</sub> ) <sub>2</sub> NNH <sub>2</sub>                       |                      |           | 343.9                                      | 336.0                                                                   |
| 14 C <sub>10</sub> H <sub>12</sub> N <sub>2</sub> + C <sub>6</sub> H <sub>6</sub> → C <sub>4</sub> H <sub>8</sub> N <sub>2</sub> (1,5-diazabicyclo[3.1.0]hexane) + C <sub>6</sub> H <sub>5</sub> -C <sub>6</sub> H <sub>5</sub>                      |                      |           | 341.7                                      | 341.7                                                                   |
| Average of isodesmic-type reactions                                                                                                                                                                                                                  |                      |           | 343.4 ± 1.9                                | 330.5 ± 6.8                                                             |
| CH <sub>4</sub> N <sub>2</sub> Diaziridine<br>                                                                                                                    |                      |           |                                            |                                                                         |
| Atomization reaction                                                                                                                                                                                                                                 |                      |           |                                            | 236.0                                                                   |
| 1 CH <sub>4</sub> N <sub>2</sub> + CH <sub>4</sub> → NH <sub>2</sub> NH <sub>2</sub> + C <sub>2</sub> H <sub>4</sub>                                                                                                                                 |                      |           | 236.1                                      | 233.3                                                                   |
| 2 CH <sub>4</sub> N <sub>2</sub> + C <sub>2</sub> H <sub>6</sub> → NH <sub>2</sub> NH <sub>2</sub> + C <sub>3</sub> H <sub>6</sub> (cyclopropane)                                                                                                    |                      |           | 235.3                                      | 233.3                                                                   |
| 3 CH <sub>4</sub> N <sub>2</sub> + CH <sub>4</sub> → NH=NH + C <sub>2</sub> H <sub>6</sub>                                                                                                                                                           |                      |           | 235.1                                      | 235.3                                                                   |
| 4 CH <sub>4</sub> N <sub>2</sub> + C <sub>2</sub> H <sub>4</sub> → NH=NH + C <sub>3</sub> H <sub>6</sub> (cyclopropane)                                                                                                                              |                      |           | 234.4                                      | 235.3                                                                   |
| 5 CH <sub>4</sub> N <sub>2</sub> + CH <sub>2</sub> =CHCH <sub>3</sub> → 2 C <sub>2</sub> H <sub>5</sub> N (aziridine)                                                                                                                                |                      |           | 234.9                                      | 234.8                                                                   |
| 6 CH <sub>4</sub> N <sub>2</sub> + C <sub>3</sub> H <sub>6</sub> (cyclopropane) → 2 C <sub>2</sub> H <sub>5</sub> N (aziridine)                                                                                                                      |                      |           | 235.2                                      | 235.0                                                                   |
| 7 CH <sub>4</sub> N <sub>2</sub> + C <sub>2</sub> H <sub>4</sub> O (oxirane) → NH <sub>2</sub> C(O)NH <sub>2</sub> + C <sub>2</sub> H <sub>4</sub>                                                                                                   |                      |           | 235.6                                      | 232.3                                                                   |

|                                                                              |                                                                                                                                                                                                   |             |     |             |
|------------------------------------------------------------------------------|---------------------------------------------------------------------------------------------------------------------------------------------------------------------------------------------------|-------------|-----|-------------|
| 8                                                                            | $\text{CH}_4\text{N}_2 + \text{CH}_3\text{C}(\text{O})\text{CH}_3 \rightarrow \text{NH}_2\text{C}(\text{O})\text{NH}_2 + \text{C}_3\text{H}_6$ (cyclopropane)                                     | 236.0       |     | 233.9       |
| 9                                                                            | $\text{CH}_4\text{N}_2 + 2 \text{CH}_4 \rightarrow 2 \text{NH}_3 + \text{C}_3\text{H}_6$ (cyclopropane)                                                                                           | 235.0       |     | 229.4       |
| 10                                                                           | $\text{CH}_4\text{N}_2 + 2 \text{CH}_4 \rightarrow 2 \text{NH}_3 + \text{CH}_2=\text{CHCH}_3$                                                                                                     | 235.3       |     | 229.6       |
| 11                                                                           | $\text{CH}_4\text{N}_2 + \text{C}_2\text{H}_6 \rightarrow \text{CH}_3\text{NHNH}_2 + \text{C}_2\text{H}_4$                                                                                        | 235.9       |     | 236.1       |
| 12                                                                           | $\text{CH}_4\text{N}_2 + \text{C}_3\text{H}_8 \rightarrow \text{CH}_3\text{NHNH}_2 + \text{C}_3\text{H}_6$ (cyclopropane)                                                                         | 235.7       |     | 235.9       |
| 13                                                                           | $\text{CH}_4\text{N}_2 + \text{C}_3\text{H}_8 \rightarrow (\text{CH}_3)_2\text{NNH}_2 + \text{C}_2\text{H}_4$                                                                                     | 235.6       |     | 238.2       |
| 14                                                                           | $\text{CH}_4\text{N}_2 + n\text{-C}_4\text{H}_{10} \rightarrow (\text{CH}_3)_2\text{NNH}_2 + \text{C}_3\text{H}_6$ (cyclopropane)                                                                 | 234.8       |     | 237.0       |
|                                                                              | Average of isodesmic-type reactions                                                                                                                                                               | 235.3 ± 1.0 |     | 234.2 ± 5.1 |
| <b>C<sub>4</sub>H<sub>8</sub>N<sub>2</sub> 1,5-Diazabicyclo[3.1.0]hexane</b> |                                                                                                                                                                                                   |             |     |             |
|                                                                              |                                                                                                                  |             |     |             |
|                                                                              | Atomization reaction                                                                                                                                                                              |             |     | 249.3       |
| 1                                                                            | $\text{C}_4\text{H}_8\text{N}_2 + 4 \text{CH}_4 \rightarrow 2 \text{C}_2\text{H}_6 + 2 \text{C}_2\text{H}_4 + \text{NH}_2\text{NH}_2$                                                             | 252.9       |     | 244.6       |
| 2                                                                            | $\text{C}_4\text{H}_8\text{N}_2 + 4 \text{CH}_4 \rightarrow 3 \text{C}_2\text{H}_6 + \text{C}_2\text{H}_4 + \text{NH}=\text{NH}$                                                                  | 251.9       |     | 246.6       |
| 3                                                                            | $\text{C}_4\text{H}_8\text{N}_2 + 6 \text{CH}_4 \rightarrow 3 \text{C}_2\text{H}_6 + 2 \text{C}_2\text{H}_4 + 2 \text{NH}_3$                                                                      | 252.6       |     | 240.7       |
| 4                                                                            | $\text{C}_4\text{H}_8\text{N}_2 + 4 \text{CH}_4 \rightarrow \text{C}_2\text{H}_6 + 2 \text{C}_2\text{H}_4 + 2 \text{CH}_3\text{NH}_2$                                                             | 252.5       |     | 245.0       |
| 5                                                                            | $\text{C}_4\text{H}_8\text{N}_2 + \text{C}_3\text{H}_6$ (cyclopropane) + $\text{C}_2\text{H}_6 \rightarrow 2 \text{C}_2\text{H}_5\text{N}$ (aziridine) + $\text{C}_5\text{H}_{10}$ (cyclopentane) | 250.9       |     | 244.6       |
| 6                                                                            | $\text{C}_4\text{H}_8\text{N}_2 + 3 \text{CH}_4 \rightarrow 2 \text{C}_2\text{H}_6 + \text{C}_2\text{H}_4 + \text{CH}_4\text{N}_2$ (diaziridine)                                                  | 252.1       |     | 246.6       |
| 7                                                                            | $\text{C}_4\text{H}_8\text{N}_2 + \text{C}_2\text{H}_6 \rightarrow \text{C}_6\text{H}_{10}$ (bicyclo[3.1.0]hexane) + $\text{NH}_2\text{NH}_2$                                                     | 254.2       |     | 248.4       |
| 8                                                                            | $\text{C}_4\text{H}_8\text{N}_2 + 3 \text{CH}_4 \rightarrow \text{C}_2\text{H}_6 + 2 \text{C}_2\text{H}_4 + \text{CH}_3\text{NHNH}_2$                                                             | 252.8       |     | 247.4       |
| 9                                                                            | $\text{C}_4\text{H}_8\text{N}_2 + 2 \text{CH}_4 \rightarrow 2 \text{C}_2\text{H}_4 + (\text{CH}_3)_2\text{NNH}_2$                                                                                 | 251.9       |     | 249.8       |
| 10                                                                           | $\text{C}_4\text{H}_8\text{N}_2 + \text{C}_3\text{H}_8 \rightarrow \text{C}_6\text{H}_{10}$ (bicyclo[3.1.0]hexane) + $\text{CH}_3\text{NHNH}_2$                                                   | 254.6       |     | 251.0       |
| 11                                                                           | $\text{C}_4\text{H}_8\text{N}_2 + n\text{-C}_4\text{H}_{10} \rightarrow \text{C}_6\text{H}_{10}$ (bicyclo[3.1.0]hexane) + $(\text{CH}_3)_2\text{NNH}_2$                                           | 253.6       |     | 252.2       |
|                                                                              | Average of isodesmic-type reactions                                                                                                                                                               | 252.7 ± 2.1 |     | 247.0 ± 6.6 |
| <b>C<sub>6</sub>H<sub>10</sub> Bicyclo[3.1.0]hexane</b>                      |                                                                                                                                                                                                   |             |     |             |
|                                                                              |                                                                                                                |             |     |             |
|                                                                              | Atomization reaction                                                                                                                                                                              |             |     | 37.9        |
|                                                                              |                                                                                                                                                                                                   |             |     | 0.7         |
| 1                                                                            | $\text{C}_6\text{H}_{10} + 4 \text{CH}_4 \rightarrow 3 \text{C}_2\text{H}_6 + 2 \text{C}_2\text{H}_4$                                                                                             | 37.6        | 1.0 | 35.1        |
| 2                                                                            | $\text{C}_6\text{H}_{10} + \text{C}_2\text{H}_6 \rightarrow \text{C}_5\text{H}_{10}$ (cyclopentane) + $\text{C}_3\text{H}_6$ (cyclopropane)                                                       | 35.7        | 2.9 | 33.3        |
| 3                                                                            | $\text{C}_6\text{H}_{10} + \text{C}_2\text{H}_6 \rightarrow \text{C}_6\text{H}_{12}$ (cyclohexane) + $\text{C}_2\text{H}_4$                                                                       | 35.8        | 2.8 | 35.7        |
|                                                                              | Average of isodesmic-type reactions                                                                                                                                                               | 36.4 ± 2.2  | 2.2 | 34.7 ± 2.5  |
|                                                                              |                                                                                                                                                                                                   |             |     | 3.9         |

|                                                                                     |                                                                                        |                  |      |              |      |
|-------------------------------------------------------------------------------------|----------------------------------------------------------------------------------------|------------------|------|--------------|------|
| $C_7H_{12}$ Norbornane                                                              |                                                                                        | -53.6 ± 1.2 [2]  |      |              |      |
|    |                                                                                        |                  |      |              |      |
| Atomization reaction                                                                |                                                                                        |                  |      | -54.9        | 1.3  |
| 1                                                                                   | $C_6H_{10} + 4 CH_4 \rightarrow 3 C_2H_6 + 2 C_2H_4$                                   | -55.8            | 2.2  | -58.4        | 4.8  |
| 2                                                                                   | $C_6H_{10} + C_2H_6 \rightarrow C_5H_{10}$ (cyclopentane) + $C_3H_6$ (cyclopropane)    | -57.1            | 3.5  | -58.0        | 4.4  |
| 3                                                                                   | $C_6H_{10} + C_2H_6 \rightarrow C_6H_{12}$ (cyclohexane) + $C_2H_4$                    | -56.4            | 2.8  | -60.7        | 7.1  |
| Average of isodesmic-type reactions                                                 |                                                                                        | -56.4 ± 1.3      | 2.8  | -59.1 ± 2.9  | 5.5  |
| $C_{10}H_{16}$ Adamantane                                                           |                                                                                        | -132.3 ± 2.2 [3] |      |              |      |
|    |                                                                                        |                  |      |              |      |
| Atomization reaction                                                                |                                                                                        |                  |      | -139.5       | 7.2  |
| 1                                                                                   | $C_{10}H_{16} + 8 CH_4 \rightarrow 6 C_2H_6 + 3 C_2H_4$                                | -133.5           | 1.2  | -145.0       | 12.7 |
| 2                                                                                   | $C_{10}H_{16} + 2 CH_4 \rightarrow 2 C_6H_{12}$ (cyclohexane)                          | -131.9           | -0.4 | -143.2       | 10.9 |
| 3                                                                                   | $C_{10}H_{16} + C_3H_8 \rightarrow C_7H_{12}$ (norbornane) + $C_6H_{12}$ (cyclohexane) | -133.0           | 0.7  | -139.5       | 7.2  |
| Average of isodesmic-type reactions                                                 |                                                                                        | -132.8 ± 1.6     | 0.5  | -142.6 ± 5.6 | 10.3 |
| $C_2H_5N$ Aziridine                                                                 |                                                                                        | 126.7 ± 0.9 [4]  |      |              |      |
|    |                                                                                        |                  |      |              |      |
| Atomization reaction                                                                |                                                                                        |                  |      | 127.5        | -0.8 |
| 1                                                                                   | $C_2H_5N + C_2H_6 \rightarrow CH_3NHCH_3 + C_2H_4$                                     | 125.7            | 1.0  | 127.0        | -0.3 |
| 2                                                                                   | $C_2H_5N + CH_4 \rightarrow CH_3NH_2 + C_2H_4$                                         | 127.4            | -0.7 | 126.1        | 0.6  |
| 3                                                                                   | $C_2H_5N + C_2H_6 \rightarrow CH_3CH_2NH_2 + C_2H_4$                                   | 127.0            | -0.3 | 126.0        | 0.7  |
| 4                                                                                   | $C_2H_5N + CH_3OH + CH_4 \rightarrow C_2H_6 + NH_2OH + C_2H_4$                         | 126.1            | 0.6  | 124.8        | 1.9  |
| 5                                                                                   | $C_2H_5N + CH_3CH_2CH_3 \rightarrow CH_3NHCH_3 + C_3H_6$ (cyclopropane)                | 125.4            | 1.3  | 126.7        | 0.0  |
| 6                                                                                   | $C_2H_5N + C_2H_6 \rightarrow CH_3NH_2 + C_3H_6$ (cyclopropane)                        | 126.6            | 0.1  | 126.0        | 0.7  |
| 7                                                                                   | $C_2H_5N + CH_3CH_2CH_3 \rightarrow CH_3CH_2NH_2 + C_3H_6$ (cyclopropane)              | 126.7            | 0.0  | 125.7        | 1.0  |
| 8                                                                                   | $C_2H_5N + CH_4 \rightarrow C_3H_6$ (cyclopropane) + $NH_3$                            | 126.6            | 0.1  | 123.9        | 2.8  |
| 9                                                                                   | $C_2H_5N + CH_3NH_2 \rightarrow C_3H_6$ (cyclopropane) + $NH_2NH_2$                    | 127.0            | -0.3 | 125.6        | 1.1  |
| Average of isodesmic-type reactions                                                 |                                                                                        | 126.5 ± 1.2      | 0.2  | 125.8 ± 1.9  | 0.9  |
| $C_{10}H_9N$ 1-Phenylpyrrole                                                        |                                                                                        | 226.4 ± 2.4 [5]  |      |              |      |
|  |                                                                                        |                  |      |              |      |



|                                                                                    |                                                                                      |                 |                 |       |                 |     |
|------------------------------------------------------------------------------------|--------------------------------------------------------------------------------------|-----------------|-----------------|-------|-----------------|-----|
| Atomization reaction                                                               |                                                                                      |                 | 222.7           | 3.7   |                 |     |
| 1                                                                                  | $C_{10}H_9N + 10 CH_4 \rightarrow 7 C_2H_4 + 3 C_2H_6 + NH_3$                        | 228.3           | -1.9            | 218.8 | 7.6             |     |
| 2                                                                                  | $C_{10}H_9N + 9 CH_4 \rightarrow 7 C_2H_4 + 2 C_2H_6 + CH_3NH_2$                     | 228.3           | -1.9            | 220.9 | 5.5             |     |
| 3                                                                                  | $C_{10}H_9N + 8 CH_4 \rightarrow 7 C_2H_4 + C_2H_6 + CH_3NHCH_3$                     | 226.6           | -0.2            | 221.8 | 4.6             |     |
| 4                                                                                  | $C_{10}H_9N + 2 CH_4 \rightarrow C_6H_6 + C_4H_5N$ (1H-pyrrole) + $C_2H_6$           | 228.5           | -2.1            | 221.3 | 5.1             |     |
| Average of isodesmic-type reactions                                                |                                                                                      |                 | $227.9 \pm 1.8$ | -1.5  | $220.7 \pm 2.7$ | 5.7 |
| $C_5H_8N_2$ 2,3-Diazabicyclo[2.2.1]-hept-2-ene                                     |                                                                                      | $207.4 \pm 2.7$ |                 | [6]   |                 |     |
|   |                                                                                      |                 |                 |       |                 |     |
| Atomization reaction                                                               |                                                                                      |                 | 204.1           | 3.3   |                 |     |
| 1                                                                                  | $C_5H_8N_2 + 7 CH_4 \rightarrow 3 C_2H_4 + 3 C_2H_6 + 2 NH_3$                        | 207.7           | -0.3            | 196.1 | 11.3            |     |
| 2                                                                                  | $C_5H_8N_2 + 5 CH_4 \rightarrow 3 C_2H_4 + 2 C_2H_6 + NH_2NH_2$                      | 208.0           | -0.6            | 200.0 | 7.4             |     |
| 3                                                                                  | $C_5H_8N_2 + 5 CH_4 \rightarrow 2 C_2H_4 + 3 C_2H_6 + NH=NH$                         | 207.0           | 0.4             | 202.0 | 5.4             |     |
| 4                                                                                  | $C_5H_8N_2 + 5 CH_4 \rightarrow 3 C_2H_4 + C_2H_6 + 2 CH_3NH_2$                      | 207.6           | -0.2            | 200.4 | 7.0             |     |
| 5                                                                                  | $C_5H_8N_2 + 4 CH_4 \rightarrow 3 C_2H_4 + C_2H_6 + CH_3NHNH_2$                      | 207.8           | -0.4            | 202.8 | 4.6             |     |
| 6                                                                                  | $C_5H_8N_2 + 3 CH_4 \rightarrow 3 C_2H_4 + (CH_3)_2NNH_2$                            | 207.0           | 0.4             | 205.1 | 2.3             |     |
| 7                                                                                  | $C_5H_8N_2 + C_2H_6 \rightarrow C_7H_{12}$ (norbornane) + $NH=NH$                    | 208.7           | -1.3            | 207.0 | 0.4             |     |
| 8                                                                                  | $C_5H_8N_2 + C_2H_6 \rightarrow C_7H_{10}$ (norbornene) + $NH_2NH_2$                 | 208.7           | -1.3            | 204.4 | 3.0             |     |
| 9                                                                                  | $C_5H_8N_2 + C_3H_8 \rightarrow C_7H_{10}$ (norbornene) + $CH_3NHNH_2$               | 209.1           | -1.7            | 207.1 | 0.3             |     |
| 10                                                                                 | $C_5H_8N_2 + n-C_4H_{10} \rightarrow C_7H_{10}$ (norbornene) + $(CH_3)_2NNH_2$       | 208.1           | -0.7            | 208.2 | -0.8            |     |
| Average of isodesmic-type reactions                                                |                                                                                      |                 | $208.0 \pm 1.4$ | -0.6  | $203.3 \pm 7.6$ | 4.1 |
| $C_8H_{14}N_2$ 1,4-Dimethyl-2,3-diazabicyclo[2.2.2]octene-2                        |                                                                                      | $92.4 \pm 4.4$  |                 | [6]   |                 |     |
|  |                                                                                      |                 |                 |       |                 |     |
| Atomization reaction                                                               |                                                                                      |                 | 78.1            | 14.3  |                 |     |
| 1                                                                                  | $C_8H_{14}N_2 + 10 CH_4 \rightarrow 3 C_2H_4 + 6 C_2H_6 + 2 NH_3$                    | 90.0            | 2.4             | 67.9  | 24.5            |     |
| 2                                                                                  | $C_8H_{14}N_2 + 8 CH_4 \rightarrow 3 C_2H_4 + 5 C_2H_6 + NH_2NH_2$                   | 90.4            | 2.0             | 71.8  | 20.6            |     |
| 3                                                                                  | $C_8H_{14}N_2 + 8 CH_4 \rightarrow 2 C_2H_4 + 6 C_2H_6 + NH=NH$                      | 89.4            | 3.0             | 73.8  | 18.6            |     |
| 4                                                                                  | $C_8H_{14}N_2 + 8 CH_4 \rightarrow 3 C_2H_4 + 4 C_2H_6 + 2 CH_3NH_2$                 | 90.0            | 2.4             | 72.2  | 20.2            |     |
| 5                                                                                  | $C_8H_{14}N_2 + 7 CH_4 \rightarrow 3 C_2H_4 + 4 C_2H_6 + CH_3NHNH_2$                 | 90.2            | 2.2             | 74.6  | 17.8            |     |
| 6                                                                                  | $C_8H_{14}N_2 + 6 CH_4 \rightarrow 3 C_2H_4 + 3 C_2H_6 + (CH_3)_2NNH_2$              | 89.3            | 3.1             | 76.9  | 15.5            |     |
| 7                                                                                  | $C_8H_{14}N_2 + 3 CH_4 \rightarrow C_7H_{12}$ (norbornane) + $NH=NH$ + $2 C_2H_6$    | 91.1            | 1.3             | 78.8  | 13.6            |     |
| 8                                                                                  | $C_8H_{14}N_2 + 3 CH_4 \rightarrow C_7H_{10}$ (norbornene) + $NH_2NH_2$ + $2 C_2H_6$ | 91.0            | 1.4             | 76.3  | 16.1            |     |

|                                          |                                                                                                                       |                     |     |                  |      |
|------------------------------------------|-----------------------------------------------------------------------------------------------------------------------|---------------------|-----|------------------|------|
| 9                                        | $C_8H_{14}N_2 + 2 CH_4 \rightarrow C_7H_{10}$ (norbornene) + $CH_3NHNH_2 + C_2H_6$                                    | 90.9                | 1.5 | 79.1             | 13.3 |
| 10                                       | $C_8H_{14}N_2 + CH_4 \rightarrow C_7H_{10}$ (norbornene) + $(CH_3)_2NNH_2$                                            | 90.0                | 2.4 | 81.4             | 11.0 |
|                                          | Average of isodesmic-type reactions                                                                                   | $90.2 \pm 1.3$      | 2.2 | $75.3 \pm 8.1$   | 17.1 |
| $C_6H_{12}N_4$ Hexamethylenetetramine    |                                                                                                                       | $203.7 \pm 0.8$ [7] |     |                  |      |
|                                          |                                      |                     |     |                  |      |
|                                          | Atomization reaction                                                                                                  |                     |     | 192.1            | 11.6 |
| 1                                        | $C_6H_{12}N_4 + 12 CH_4 \rightarrow 3 C_2H_4 + 6 C_2H_6 + 4 NH_3$                                                     | 202.2               | 1.5 | 175.0            | 28.7 |
| 2                                        | $C_6H_{12}N_4 + 8 CH_4 \rightarrow 3 C_2H_4 + 4 C_2H_6 + 2 NH_2NH_2$                                                  | 202.8               | 0.9 | 182.8            | 20.9 |
| 3                                        | $C_6H_{12}N_4 + 8 CH_4 \rightarrow C_2H_4 + 6 C_2H_6 + 2 NH=NH$                                                       | 200.9               | 2.8 | 186.8            | 16.9 |
| 4                                        | $C_6H_{12}N_4 + 8 CH_4 \rightarrow 3 C_2H_4 + 2 C_2H_6 + 4 CH_3NH_2$                                                  | 202.1               | 1.6 | 183.6            | 20.1 |
| 5                                        | $C_6H_{12}N_4 + 6 CH_4 \rightarrow 3 C_2H_4 + 2 C_2H_6 + 2 CH_3NHNH_2$                                                | 202.5               | 1.2 | 188.4            | 15.3 |
| 6                                        | $C_6H_{12}N_4 + 4 CH_4 \rightarrow 3 C_2H_4 + 2 (CH_3)_2NNH_2$                                                        | 200.8               | 2.9 | 193.0            | 10.7 |
| 7                                        | $C_6H_{12}N_4 + 4 C_6H_{12}$ (cyclohexane) $\rightarrow C_{10}H_{16}$ (adamantane) + 4 $C_5H_{11}N$ (piperidine)      | 202.4               | 1.3 | 202.8            | 0.9  |
|                                          | Average of isodesmic-type reactions                                                                                   | $202.0 \pm 1.6$     | 1.7 | $187.5 \pm 17.5$ | 16.2 |
| $C_6H_{12}N_2$ 1,2-Diazaspiro[2.5]octane |                                                                                                                       | $128.5^b$ [8]       |     |                  |      |
|                                          |                                      |                     |     |                  |      |
|                                          | Atomization reaction                                                                                                  |                     |     | 128.1            |      |
| 1                                        | $C_6H_{12}N_2 + 8 CH_4 \rightarrow 2 C_2H_4 + 5 C_2H_6 + 2 NH_3$                                                      | 130.9               |     | 117.7            |      |
| 2                                        | $C_6H_{12}N_2 + 6 CH_4 \rightarrow 2 C_2H_4 + 4 C_2H_6 + NH_2NH_2$                                                    | 131.2               |     | 121.6            |      |
| 3                                        | $C_6H_{12}N_2 + 6 CH_4 \rightarrow C_2H_4 + 5 C_2H_6 + NH=NH$                                                         | 130.3               |     | 123.6            |      |
| 4                                        | $C_6H_{12}N_2 + 6 CH_4 \rightarrow 2 C_2H_4 + 3 C_2H_6 + 2 CH_3NH_2$                                                  | 130.8               |     | 122.0            |      |
| 5                                        | $C_6H_{12}N_2 + 5 CH_4 \rightarrow 2 C_2H_4 + 3 C_2H_6 + CH_3NHNH_2$                                                  | 131.1               |     | 124.4            |      |
| 6                                        | $C_6H_{12}N_2 + 4 CH_4 \rightarrow 2 C_2H_4 + 2 C_2H_6 + (CH_3)_2NNH_2$                                               | 130.2               |     | 126.7            |      |
| 7                                        | $C_6H_{12}N_2 + CH_4 \rightarrow C_6H_{12}$ (cyclohexane) + $CH_4N_2$ (diaziridine)                                   | 128.6               |     | 124.2            |      |
| 8                                        | $C_6H_{12}N_2 + C_2H_4 + C_2H_6 \rightarrow C_6H_{12}$ (cyclohexane) + 2 $C_2H_5N$ (aziridine)                        | 127.8               |     | 123.9            |      |
| 9                                        | $C_6H_{12}N_2 + CH_4 + C_2H_6 \rightarrow C_6H_{12}$ (cyclohexane) + $C_3H_6$ (cyclopropane) + $NH_2NH_2$             | 128.6               |     | 122.2            |      |
| 10                                       | $C_6H_{12}N_2 + 2 CH_4 \rightarrow C_6H_{10}$ (bicyclo[3.1.0]hexane) + $N_2H_4 + C_2H_6$                              | 132.5               |     | 125.4            |      |
| 11                                       | $C_6H_{12}N_2 + C_6H_6 + CH_4 \rightarrow C_4H_4N_2$ (pyrazine) + $C_6H_{12}$ (cyclohexane) + $C_3H_6$ (cyclopropane) | 126.1               |     | 124.4            |      |
| 12                                       | $C_6H_{12}N_2 + CH_4 \rightarrow C_4H_{10}N_2$ (piperazine) + $C_3H_6$ (cyclopropane)                                 | 127.5               |     | 125.2            |      |
|                                          | Average of isodesmic-type reactions                                                                                   | $129.6 \pm 3.8$     |     | $123.5 \pm 4.7$  |      |

<sup>a</sup> The uncertainty of calculated values corresponds to twice the standard deviation of the mean.

<sup>a</sup> Result of high-level W1-F12 calculation.

## References

- [1] V.P. Kolesov, S.M. Pimenova, V.A. Lukyanova, T.S. Kuznetsova, M.P. Kozina, *J. Chem. Thermodyn.* 30 (1998) 1455–1464.
- [2] S.P. Verevkin, V.N. Emel'yanenko, *J. Phys. Chem. A* 108 (2004) 6575–6580.
- [3] A.B. Bazyleva, A.V. Blokhin, G.J. Kabo, M.B. Charapennikau, V.N. Emel'yanenko, S.P. Verevkin, V. Diky, *J. Phys. Chem. B* 115 (2011) 10064–10072.
- [4] B. Ruscic, D.H. Bross, *Active Thermochemical Tables (ATcT), Version 1.124*: Argonne National Laboratory, 2022, <http://atct.anl.gov/> (accessed May 25, 2023).
- [5] A.F.L.O.M. Santos, M.A.V. Ribeiro da Silva, *J. Chem. Thermodyn.* 42 (2010) 734–741.
- [6] P.S. Engel, R.A. Melaugh, M. Månsson, J. W. Timberlake, A.W. Garner, F.D. Rossini, *J. Chem. Thermodyn.* 8 (1976) 607–621.
- [7] S.P. Verevkin, *J. Chem. Thermodyn.* 34 (2002) 263–275.
- [8] N.V. Muravyev, K.A. Monogarov, I.N. Melnikov, A.N. Pivkina, V.G. Kiselev, *Phys. Chem. Chem. Phys.* 23 (2021) 15522–15542.

**Table S6** Molecular electrostatic potential parameters calculated for the molecular geometries optimized at the B3LYP/6-311++G(3df,2p) level and coefficients  $a$ ,  $b$ ,  $c$ ,  $d$ ,  $e$  and  $f$  in the equation relating the enthalpy of sublimation to the descriptors of electrostatic potential. Comparison between experimental and calculated enthalpies of sublimation

$$\Delta_{\text{sub}}H_{\text{m}}^{\circ}(298.15 \text{ K}) = a\rho + bA_{\text{S}} + c\bar{V}_{\text{S}} + d(\sigma_{\text{tot}}^2v) + e\Pi + f$$

$$a = 8.080614 \text{ kcal}\cdot\text{mol}^{-1}\cdot\text{cm}^3\cdot\text{g}^{-1}$$

$$b = 0.100881 \text{ kcal}\cdot\text{mol}^{-1}\cdot\text{\AA}^{-2}$$

$$c = -0.454822$$

$$d = 0.139893 \text{ (kcal}\cdot\text{mol}^{-1})^{-1}$$

$$e = 0.254010$$

$$f = -13.949259 \text{ kcal}\cdot\text{mol}^{-1}$$

|   | Molecule                                                                                                                                             | $\Delta_{\text{sub}}H_{\text{m}}^{\circ}(\text{exp})$<br>kJ·mol <sup>-1</sup> | Reference <sup>a</sup> | $\Delta_{\text{sub}}H_{\text{m}}^{\circ}(\text{calc})$<br>kJ·mol <sup>-1</sup> | $\Delta^b$<br>kJ·mol <sup>-1</sup> | $\rho$<br>g·cm <sup>-3</sup> | $A_{\text{S}}$<br>Å <sup>2</sup> | $\bar{V}_{\text{S}}$<br>kcal·mol <sup>-1</sup> | $\sigma_{\text{tot}}^2v$<br>(kcal·mol <sup>-1</sup> ) <sup>2</sup> | $\Pi$<br>kcal·mol <sup>-1</sup> |
|---|------------------------------------------------------------------------------------------------------------------------------------------------------|-------------------------------------------------------------------------------|------------------------|--------------------------------------------------------------------------------|------------------------------------|------------------------------|----------------------------------|------------------------------------------------|--------------------------------------------------------------------|---------------------------------|
| 1 | CH <sub>2</sub> N <sub>4</sub>  1H-Tetrazole                        | 90.1 ± 1.6                                                                    | [1]: 1990KOZ/SIM       | 93.8                                                                           | -3.7                               | 1.4399                       | 95.34080                         | 2.15423                                        | 70.84512                                                           | 24.32154                        |
| 2 | C <sub>2</sub> H <sub>3</sub> N <sub>3</sub>  1H-1,2,4-Triazole     | 84.0 ± 0.7                                                                    | [1]: 1989JIM/ROU       | 82.7                                                                           | 1.3                                | 1.3332                       | 100.09657                        | 1.54833                                        | 65.94989                                                           | 17.06130                        |
| 3 | C <sub>2</sub> H <sub>4</sub> N <sub>4</sub>  5-Methyl-1H-tetrazole | 96.3 ± 0.5                                                                    | [1]: 1990KOZ/SIM       | 94.0                                                                           | 2.3                                | 1.3404                       | 117.98407                        | 2.96497                                        | 66.56570                                                           | 22.51817                        |
| 4 | C <sub>3</sub> H <sub>3</sub> N <sub>3</sub>  1,3,5-Triazine      | 54.2 ± 0.2                                                                    | [1]: 1982BYS           | 53.0                                                                           | 1.2                                | 1.3516                       | 112.02979                        | 2.36439                                        | 18.44257                                                           | 11.37348                        |
| 5 | C <sub>3</sub> H <sub>4</sub> N <sub>2</sub>  1H-Imidazole        | 83.1 ± 0.2                                                                    | [1]: 1987JIM/ROU       | 88.3                                                                           | -5.2                               | 1.2255                       | 105.31562                        | 1.10623                                        | 77.39458                                                           | 16.51049                        |
| 6 | C <sub>3</sub> H <sub>4</sub> N <sub>2</sub>  1H-Pyrazole         | 72.6 ± 0.8                                                                    | [2]                    | 71.1                                                                           | 1.5                                | 1.2220                       | 105.28471                        | 1.03638                                        | 52.68342                                                           | 13.97204                        |
| 7 | C <sub>4</sub> H <sub>4</sub> N <sub>2</sub>  Pyrazine            | 57.5 ± 0.4                                                                    | [1]: 2012VER/EME       | 55.7                                                                           | 1.8                                | 1.2535                       | 117.10627                        | 1.78826                                        | 24.86566                                                           | 10.40565                        |

|    |                      |                                                                                                                      |             |                  |       |      |        |           |         |          |          |
|----|----------------------|----------------------------------------------------------------------------------------------------------------------|-------------|------------------|-------|------|--------|-----------|---------|----------|----------|
| 8  | <chem>C4H6N2</chem>  |  2-Methylimidazole                  | 88.4 ± 0.7  | [1]: 1992JIM/ROU | 86.5  | 1.9  | 1.1786 | 127.58189 | 1.04881 | 64.95114 | 14.22767 |
| 9  | <chem>C5H8N2</chem>  |  2-Ethylimidazole                   | 89.6 ± 0.4  | [1]: 1992JIM/ROU | 90.1  | -0.5 | 1.1485 | 148.04752 | 0.75129 | 60.60051 | 12.28993 |
| 10 | <chem>C5H8N2</chem>  |  3,5-Dimethylpyrazole               | 83.4 ± 2.4  | [1]: 2001RIB/FER | 78.7  | 4.7  | 1.1459 | 149.57644 | 0.87113 | 42.71403 | 11.18598 |
| 11 | <chem>C5H8N2</chem>  |  2,3-Diazabicyclo[2.2.1]-hept-2-ene | 55.3 ± 0.6  | [1]: 1976ENG/MEL | 57.1  | -1.8 | 1.2165 | 135.54804 | 2.35346 | 14.40614 | 12.38346 |
| 12 | <chem>C6H5N3</chem>  |  1H-Benzotriazole                   | 99.0 ± 0.5  | [1]: 1989JIM/ROU | 102.1 | -3.1 | 1.3499 | 150.21462 | 1.73021 | 67.81589 | 14.11554 |
| 13 | <chem>C6H6</chem>    |  Benzene                            | 44.7 ± 0.2  | [3]              | 43.6  | 1.1  | 1.0913 | 126.52514 | 0.75830 | 8.364760 | 7.69947  |
| 14 | <chem>C6H12N2</chem> |  1,4-Diazabicyclo[2.2.2]octane      | 61.9 ± 3.3  | [1]: 1960WAD/KIS | 54.9  | 7.0  | 1.1682 | 155.02170 | 1.96605 | 7.018490 | 7.50366  |
| 15 | <chem>C6H12N2</chem> |  Tetramethyldiazetene              | 62.3 ± 0.3  | [1]: 1978MON/ENG | 64.8  | -2.5 | 1.0869 | 167.96108 | 2.48581 | 15.30462 | 10.61700 |
| 16 | <chem>C6H12N4</chem> |  Hexamethylenetetramine           | 79.6 ± 0.4  | [1]: 2002VER2    | 68.9  | 10.7 | 1.3235 | 162.69942 | 1.92728 | 13.14574 | 9.245210 |
| 17 | <chem>C7H6N2</chem>  |  1H-Benzimidazole                 | 102.2 ± 0.4 | [1]: 1987JIM/ROU | 97.6  | 4.6  | 1.2908 | 154.68820 | 0.58525 | 57.70676 | 13.54857 |

|    |                                               |                                                                                                                              |             |                   |       |      |        |           |         |          |          |
|----|-----------------------------------------------|------------------------------------------------------------------------------------------------------------------------------|-------------|-------------------|-------|------|--------|-----------|---------|----------|----------|
| 18 | C <sub>7</sub> H <sub>6</sub> N <sub>4</sub>  | 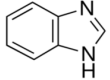<br>1-Phenyl-1 <i>H</i> -tetrazole          | 104.0 ± 3.0 | [4]               | 101.7 | 2.3  | 1.3557 | 178.59656 | 3.18704 | 49.42998 | 15.03911 |
| 19 | C <sub>7</sub> H <sub>6</sub> N <sub>4</sub>  | <br>5-Phenyl-1 <i>H</i> -tetrazole          | 115.0 ± 3.0 | [4]               | 119.2 | -4.2 | 1.3573 | 177.88138 | 2.92513 | 78.02811 | 15.47864 |
| 20 | C <sub>7</sub> H <sub>10</sub>                | <br>2-Norbornene                            | 37.7 ± 0.9  | [1]: 1978STE2     | 43.3  | -5.6 | 1.0955 | 144.28742 | 1.53389 | 4.775550 | 3.57352  |
| 21 | C <sub>7</sub> H <sub>10</sub>                | <br>Nortricyclene                           | 39.2 ± 1.1  | [1]: 1976KOZ/BYC  | 41.9  | -2.7 | 1.1240 | 141.65071 | 1.38551 | 3.046210 | 3.08917  |
| 22 | C <sub>7</sub> H <sub>12</sub>                | <br>Norbornane                              | 40.1 ± 0.4  | [1]: 2004VER/EME  | 39.8  | 0.3  | 1.0653 | 149.37874 | 1.87868 | 0.443250 | 2.31321  |
| 23 | C <sub>7</sub> H <sub>14</sub> N <sub>2</sub> | <br>1,1,3,3-Tetramethyl-trimethylenediazene | 61.6 ± 0.2  | [1]: 1976ENG/MEL  | 70.0  | -8.3 | 1.0819 | 185.8329  | 2.04328 | 13.41022 | 8.81165  |
| 24 | C <sub>8</sub> H <sub>6</sub> N <sub>2</sub>  | <br>Quinazoline                             | 76.6 ± 1.4  | [1]: 1995RIB/MAT4 | 80.4  | -3.8 | 1.3025 | 165.12251 | 1.56166 | 29.68440 | 9.95365  |
| 25 | C <sub>8</sub> H <sub>7</sub> N               | <br>1 <i>H</i> -Indole                     | 73.9 ± 0.4  | [1]: 2011VER/EME3 | 75.8  | -1.9 | 1.2280 | 159.48564 | 0.27046 | 24.55837 | 10.81636 |
| 26 | C <sub>8</sub> H <sub>12</sub>                | <br>Bicyclo[2.2.2]oct-2-ene               | 43.8 ± 0.1  | [1]: 1971WON/WES  | 48.5  | -4.7 | 1.1005 | 158.98000 | 1.62031 | 3.785010 | 3.22674  |
| 27 | C <sub>8</sub> H <sub>14</sub>                | <br>Bicyclo[2.2.2]octane                  | 48.0 ± 0.2  | [1]: 1971WON/WES  | 45.7  | 2.3  | 1.0726 | 163.88460 | 2.02160 | 0.495070 | 2.04995  |
| 28 | C <sub>8</sub> H <sub>14</sub> N <sub>2</sub> | <br>1,4-Dimethyl-2,3-diazabicyclo-        |             |                   |       |      |        |           |         |          |          |

|    |                                               |                                                                                                                       |            |                   |      |      |        |           |          |          |          |
|----|-----------------------------------------------|-----------------------------------------------------------------------------------------------------------------------|------------|-------------------|------|------|--------|-----------|----------|----------|----------|
|    |                                               | [2.2.2]octene-2                                                                                                       | 72.0 ± 0.5 | [1]: 1976ENG/MEL  | 74.0 | -2.0 | 1.1584 | 185.63733 | 2.02040  | 15.09774 | 9.27705  |
| 29 | C <sub>9</sub> H <sub>9</sub> N               | 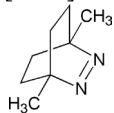<br>2-Methylindole                   | 86.0 ± 0.3 | [5]               | 83.8 | 2.2  | 1.1985 | 181.22812 | 0.56723  | 25.49906 | 10.66127 |
| 30 | C <sub>9</sub> H <sub>9</sub> N               | <br>3-Methylindole                   | 90.4 ± 1.9 | [1]: 2009RIB/CAB2 | 82.1 | 8.3  | 1.1989 | 179.56843 | 0.28543  | 24.97758 | 9.46616  |
| 31 | C <sub>9</sub> H <sub>14</sub>                | <br>Bicyclo[3.2.2]non-6-ene          | 48.0 ± 1.0 | [1]: 1983JOC/DEK2 | 53.8 | -5.8 | 1.1002 | 172.83933 | 1.70136  | 3.483650 | 3.01007  |
| 32 | C <sub>9</sub> H <sub>14</sub>                | <br>Bicyclo[4.2.1]non-3-ene          | 49.7 ± 0.8 | [1]: 1983JOC/DEK2 | 54.5 | -4.8 | 1.0888 | 175.25385 | 1.64657  | 3.041050 | 3.20774  |
| 33 | C <sub>9</sub> H <sub>16</sub>                | <br>Bicyclo[3.3.1]nonane             | 50.6 ± 2.1 | [1]: 1977PAR/STE  | 51.3 | -0.7 | 1.0758 | 177.38859 | 2.03476  | 0.441030 | 1.86747  |
| 34 | C <sub>9</sub> H <sub>17</sub> N              | <br><i>trans</i> -Decahydroquinoline | 77.9       | [1]: 1994STE/CHI  | 67.2 | 10.7 | 1.0951 | 195.13565 | 1.71043  | 9.529910 | 3.64767  |
| 35 | C <sub>10</sub> H <sub>8</sub> N <sub>2</sub> | <br>2,2'-Bipyridine                 | 81.8 ± 2.3 | [1]: 1995RIB/MOR  | 86.7 | -4.9 | 1.2759 | 197.78770 | -0.22872 | 14.66943 | 8.83875  |
| 36 | C <sub>10</sub> H <sub>8</sub> N <sub>2</sub> | <br>2,4'-Bipyridine                | 87.9 ± 1.7 | [1]: 1995RIB/MOR  | 94.4 | -6.5 | 1.2754 | 197.47897 | 1.21630  | 30.20946 | 10.25184 |
| 37 | C <sub>10</sub> H <sub>9</sub> N              | <br>1-Phenylpyrrole                | 80.8 ± 0.6 | [1]: 2010SAN/RIB  | 78.3 | 2.5  | 1.2089 | 191.65672 | 0.93854  | 13.23911 | 8.38267  |
| 38 | C <sub>10</sub> H <sub>10</sub>               | <br>Basketene                      | 55.3 ± 0.5 | [1]: 2002VER/KUM  | 58.9 | -3.6 | 1.2561 | 167.03375 | 1.23442  | 4.53104  | 3.75702  |

|    |                                                                                                                                       |                                            |             |                   |      |      |        |           |         |          |         |
|----|---------------------------------------------------------------------------------------------------------------------------------------|--------------------------------------------|-------------|-------------------|------|------|--------|-----------|---------|----------|---------|
| 39 | <br>C <sub>10</sub> H <sub>10</sub>                  | Snoutene                                   | 58.7 ± 0.4  | [1]: 2002VER/KUM  | 60.9 | -2.2 | 1.2598 | 165.28981 | 0.88181 | 5.19876  | 5.20359 |
| 40 | <br>C <sub>10</sub> H <sub>10</sub>                  | Bullvalene                                 | 71.8 ± 0.4  | [1]: 1981MAN/SUN  | 66.7 | 5.1  | 1.1965 | 171.14981 | 0.65769 | 9.56828  | 7.58814 |
| 41 | <br>C <sub>10</sub> H <sub>10</sub> N <sub>2</sub>   | 1-Benzylimidazole                          | 102.1 ± 0.4 | [1]: 1999MO/YAN   | 96.9 | 5.2  | 1.2250 | 208.44063 | 2.17577 | 30.50270 | 11.4798 |
| 42 | <br>C <sub>10</sub> H <sub>10</sub> N <sub>2</sub>   | 2,3-Dimethylquinoxaline                    | 85.8 ± 1.8  | [1]: 1996RIB/MOR  | 86.3 | -0.5 | 1.2401 | 204.14497 | 0.43877 | 13.88562 | 8.73916 |
| 43 | <br>C <sub>10</sub> H <sub>11</sub> N                | 2,3-Dimethylindole                         | 86.8 ± 0.3  | [1]: 2011VER/EME3 | 89.4 | -2.6 | 1.1803 | 198.64452 | 0.57752 | 25.71572 | 9.44185 |
| 44 | <br>C <sub>10</sub> H <sub>14</sub>                  | 1,2,4,5-Tetramethylbenzene                 | 74.6 ± 0.3  | [1]: 1989COL/JIM  | 70.7 | 3.9  | 1.0644 | 201.25780 | 0.81863 | 7.02784  | 5.23709 |
| 45 | <br>C <sub>10</sub> H <sub>16</sub>                  | Adamantane                                 | 59.1 ± 0.9  | [1]: 2011BAS/BLO  | 54.4 | 4.7  | 1.1392 | 179.83445 | 2.02888 | 0.44449  | 1.86013 |
| 46 | <br>C <sub>10</sub> H <sub>16</sub>                 | <i>endo</i> -Tricyclo[5.2.1.0(2.6)]-decane | 52.9 ± 1.3  | [1]: 1971BOY/SAN  | 56.2 | -3.3 | 1.1278 | 183.50775 | 1.91733 | 0.43618  | 2.20134 |
| 47 | <br>C <sub>10</sub> H <sub>18</sub>                | Bicyclo[3.3.2]decane                       | 58.2 ± 2.1  | [1]: 1977PAR/STE  | 56.6 | 1.6  | 1.0789 | 189.93903 | 2.09483 | 0.50922  | 1.88924 |
| 48 | <br>C <sub>10</sub> H <sub>20</sub> N <sub>2</sub> | 4-Piperidinopiperidine                     | 88.6 ± 1.9  | [6]               | 83.9 | 4.7  | 1.1139 | 227.81089 | 1.35802 | 10.96802 | 4.35949 |



|    |                                                |                                                                                                                                                                        |             |                   |       |      |        |           |          |          |          |
|----|------------------------------------------------|------------------------------------------------------------------------------------------------------------------------------------------------------------------------|-------------|-------------------|-------|------|--------|-----------|----------|----------|----------|
| 49 | C <sub>11</sub> H <sub>9</sub> N               | 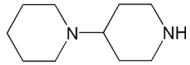<br>4-Phenylpyridine                                                                  | 81.4 ± 1.6  | [7]: 2000RIB/MAT2 | 86.4  | -5.0 | 1.2275 | 201.96303 | 1.57253  | 19.50499 | 8.97987  |
| 50 | C <sub>11</sub> H <sub>11</sub> N              | <br>1-(4-Methylphenyl)pyrrole                                                         | 83.7 ± 0.5  | [8]               | 85.3  | -1.6 | 1.1872 | 212.49863 | 1.00524  | 12.04399 | 8.19349  |
| 51 | C <sub>11</sub> H <sub>11</sub> N              | <br>2,6-Dimethylquinoline                                                             | 84.5 ± 1.5  | [7]: 1995RIB/MAT3 | 87.7  | -3.2 | 1.1941 | 211.32864 | 0.35097  | 14.25110 | 8.29110  |
| 52 | C <sub>11</sub> H <sub>11</sub> N              | <br>2,7-Dimethylquinoline                                                             | 87.5 ± 1.5  | [7]: 1995RIB/MAT3 | 88.0  | -0.5 | 1.1939 | 211.34422 | 0.21046  | 14.50330 | 8.17975  |
| 53 | C <sub>11</sub> H <sub>14</sub>                | <br>Pentacyclo[5.4.0.0 <sup>2,6</sup> .0 <sup>3,10</sup> .0 <sup>5,9</sup> ]-undecane | 55.9 ± 1.0  | [7]: 1995KAB/KOZ  | 59.3  | -3.5 | 1.2371 | 181.29294 | 1.66853  | 0.43389  | 2.14808  |
| 54 | C <sub>11</sub> H <sub>20</sub>                | <br>Bicyclo[3.3.3]undecane                                                            | 63.6 ± 0.8  | [7]: 1975PAR/STE  | 61.7  | 1.9  | 1.0831 | 201.79329 | 2.08992  | 0.48277  | 1.83049  |
| 55 | C <sub>12</sub> H <sub>8</sub> N <sub>2</sub>  | <br>Phenazine                                                                         | 95.9 ± 0.4  | [7]: 2010CHI/KAZ2 | 94.8  | 1.1  | 1.3232 | 213.80519 | 0.09269  | 16.44519 | 8.24455  |
| 56 | C <sub>12</sub> H <sub>8</sub> N <sub>2</sub>  | <br>Benzo[c]cinnoline                                                                 | 103.0 ± 0.6 | [9]               | 102.9 | 0.1  | 1.3271 | 210.66074 | 0.96408  | 31.14264 | 10.44282 |
| 57 | C <sub>12</sub> H <sub>9</sub> N               | <br>Carbazole                                                                        | 103.3 ± 1.1 | [7]: 1990JIM/ROU  | 92.2  | 11.1 | 1.2736 | 207.29059 | 0.52652  | 18.04690 | 9.87240  |
| 58 | C <sub>12</sub> H <sub>10</sub>                | <br>Biphenyl                                                                        | 81.8 ± 0.2  | [10]              | 80.7  | 1.1  | 1.1838 | 206.46788 | 0.46088  | 7.84219  | 7.70053  |
| 59 | C <sub>12</sub> H <sub>10</sub> N <sub>2</sub> | <br><i>trans</i> -Azobenzene                                                        | 94.1 ± 0.7  | [7]: 1996STE/CHI2 | 96.7  | -2.6 | 1.2426 | 234.79872 | -0.24007 | 8.48688  | 8.03450  |

|    |                                                                                     |                   |                                          |                 |                  |       |      |        |           |         |          |          |
|----|-------------------------------------------------------------------------------------|-------------------|------------------------------------------|-----------------|------------------|-------|------|--------|-----------|---------|----------|----------|
| 60 | 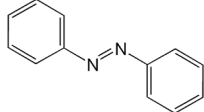   | $C_{12}H_{10}N_2$ | <i>cis</i> -Azobenzene                   | $92.9 \pm 0.1$  | [7]: 1977SHU/PET | 98.8  | -5.9 | 1.2481 | 228.90069 | 0.92741 | 17.33193 | 9.42839  |
| 61 |    | $C_{12}H_{11}N$   | Diphenylamine                            | $95.2 \pm 0.6$  | [7]: 2011SUR/PER | 91.8  | 3.4  | 1.2076 | 221.59530 | 0.83273 | 14.16766 | 8.54839  |
| 62 |    | $C_{12}H_{21}N$   | Dodecahydrocarbazole                     | $84.0 \pm 0.6$  | [7]: 2015STA/EME | 84.3  | -0.3 | 1.1289 | 233.76395 | 1.76683 | 8.69866  | 3.81675  |
| 63 |    | $C_{13}H_9N$      | Acridine                                 | $94.5 \pm 4.0$  | [7]: 1989STE/CHI | 95.7  | -1.2 | 1.2819 | 217.49444 | 0.21875 | 16.76061 | 8.97737  |
| 64 |    | $C_{13}H_9N$      | Phenanthridine                           | $98.6 \pm 4.0$  | [7]: 1989STE/CHI | 95.1  | 3.5  | 1.2891 | 214.34748 | 0.60818 | 18.6712  | 9.10132  |
| 65 |    | $C_{13}H_9N$      | 7,8-Benzoquinoline                       | $90.2 \pm 2.0$  | [7]: 1989STE/CHI | 93.7  | -3.5 | 1.2888 | 214.77928 | 0.04126 | 14.44425 | 8.88206  |
| 66 |  | $C_{13}H_{10}N_2$ | 2-Phenylbenzimidazole                    | $123.0 \pm 1.7$ | [7]: 2005RIB/RIB | 115.6 | 7.4  | 1.2917 | 236.08684 | 0.49833 | 34.50155 | 10.71882 |
| 67 |  | $C_{13}H_{11}N$   | <i>N</i> -Methylcarbazole                | $92.7 \pm 1.9$  | [11]             | 95.2  | -2.5 | 1.2508 | 224.11769 | 0.56080 | 13.19238 | 9.45143  |
| 68 |  | $C_{13}H_{11}N$   | ( <i>N</i> -Phenylmethylene)-benzenamine | $98.1 \pm 1.2$  | [7]: 1997VER/MOR | 99.0  | -0.9 | 1.2067 | 239.27696 | 0.27102 | 12.19333 | 8.43134  |

|    |                                                                                     |                                   |                                                  |             |                   |                                    |                                |        |           |          |          |         |
|----|-------------------------------------------------------------------------------------|-----------------------------------|--------------------------------------------------|-------------|-------------------|------------------------------------|--------------------------------|--------|-----------|----------|----------|---------|
| 69 | 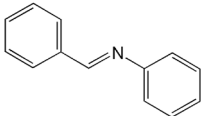   | C <sub>13</sub> H <sub>12</sub>   | Diphenylmethane                                  | 87.6 ± 0.8  | [7]: 1999VER5     | 88.6                               | -1.4                           | 1.1620 | 227.68910 | 0.51746  | 7.97693  | 7.45543 |
| 70 |    | C <sub>13</sub> H <sub>15</sub> N | 1,2,3,4-Tetrahydro- <i>N</i> -methylcarbazole    | 93.5 ± 1.4  | [11]              | 97.9                               | -4.4                           | 1.2013 | 235.92084 | 0.75491  | 14.63471 | 8.37394 |
| 71 |    | C <sub>14</sub> H <sub>13</sub> N | <i>N</i> -Ethylcarbazole                         | 97.1 ± 1.0  | [7]: 2011VER/EME  | 100.9                              | -3.8                           | 1.2276 | 242.76036 | 0.7224   | 12.17591 | 9.02055 |
| 72 |    | C <sub>14</sub> H <sub>14</sub>   | 1,2-Diphenylethane                               | 93.2 ± 0.9  | [7]: 2001MON/HIL5 | 96.7                               | -3.5                           | 1.1446 | 250.13337 | 1.10675  | 8.67195  | 7.32091 |
| 73 |    | C <sub>14</sub> H <sub>24</sub>   | <i>trans-syn-trans</i> -Tetradecahydroanthracene | 87.4 ± 2.4  | [7]: 1963MAR/FRI  | 84.1                               | 3.3                            | 1.0957 | 253.54389 | 2.09481  | 0.61615  | 1.92468 |
| 74 |    | C <sub>15</sub> H <sub>11</sub> N | 2-Phenylquinoline                                | 105.4 ± 0.9 | [7]: 1997RIB/MAT3 | 107.2                              | -1.8                           | 1.2650 | 249.65384 | -0.05865 | 13.93466 | 8.64297 |
| 75 |  | C <sub>15</sub> H <sub>13</sub> N | 1-Methyl-2-phenylindole                          | 111.1 ± 0.7 | [12]              | 107.3                              | 3.8                            | 1.2359 | 256.15678 | 0.63844  | 12.99293 | 8.80301 |
|    |                                                                                     |                                   |                                                  |             |                   | <b>Root-mean-square deviation:</b> | <b>4.2 kJ·mol<sup>-1</sup></b> |        |           |          |          |         |
|    |                                                                                     |                                   |                                                  |             |                   | Maximum deviation:                 | 11.1 kJ·mol <sup>-1</sup>      |        |           |          |          |         |
|    |                                                                                     |                                   |                                                  |             |                   | Minimum deviation:                 | -8.3 kJ·mol <sup>-1</sup>      |        |           |          |          |         |

|                                                |                                        |      |        |           |         |          |          |
|------------------------------------------------|----------------------------------------|------|--------|-----------|---------|----------|----------|
| C <sub>10</sub> H <sub>12</sub> N <sub>2</sub> | 6-Phenyl-1,5-diazabicyclo[3.1.0]hexane | 92.9 | 1.2165 | 210.79916 | 0.31218 | 17.13877 | 10.98777 |
|------------------------------------------------|----------------------------------------|------|--------|-----------|---------|----------|----------|

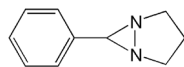

<sup>a</sup> References to the experimental data for most of the compounds are given in the compendium by Acree and Chickos [1,7]; for these compounds, in addition to Refs. [1,7], the corresponding references from this compendium are given nearby. The list of all references is given below.

<sup>b</sup>  $\Delta = \Delta_{\text{sub}}H_{\text{m}}^{\circ}(298.15 \text{ K, exp}) - \Delta_{\text{sub}}H_{\text{m}}^{\circ}(298.15 \text{ K, calc})$ .

## References

- [1] W. Acree, Jr., J.S. Chickos, *J. Phys. Chem. Ref. Data* 45 (2016) 033101.
- [2] S.P. Safronov, R.N. Nagrimanov, A.A. Samatov, V.N. Emel'yanenko, D.H. Zaitsau, A.A. Pimerzin, A. Skrzypczak, S.P. Verevkin, *J. Chem. Thermodyn.* 128 (2019) 173–186.
- [3] M.J.S. Monte, A.R.R.P. Almeida, *Struct. Chem.* 24 (2013) 2001–2016.
- [4] A.A. Balepin, V.P. Lebedev, E.A. Miroshnichenko, G.I. Koldobskii, V.A. Ostovskii, B.P. Larionov, B.V. Gidasov, Yu.A. Lebedev, *Svoistva Veshchestv Str. Mol.*, 1977, 93-98 (cited from NIST Chemistry WebBook, <http://webbook.nist.gov/chemistry/>).
- [5] R.D. Chirico, E. Paulechka, A. Bazyleva, A.F. Kazakov, *J. Chem. Thermodyn.* 125 (2018) 257–270.
- [6] M.A.V. Ribeiro da Silva, J.I.T.A. Cabral, *J. Therm. Anal. Calorim.* 90 (2007) 865–871.
- [7] W. Acree, Jr., J.S. Chickos, *J. Phys. Chem. Ref. Data* 46 (2017) 013104.
- [8] A.F.L.O.M. Santos, M.A.V. Ribeiro da Silva, *J. Chem. Thermodyn.* 42 (2010) 734–741.
- [9] H.K. Cammenga, V.N. Emel'yanenko, S.P. Verevkin, *Ind. Eng. Chem. Res.* 48 (2009) 10120–10128.
- [10] D.H. Zaitsau, V.N. Emel'yanenko, A.A. Pimerzin, S.P. Verevkin, *J. Chem. Thermodyn.* 122 (2018) 1–12.
- [11] K. Stark, V.N. Emel'yanenko, A.A. Zhabina, M.A. Varfolomeev, S.P. Verevkin, K. Müller, W. Arlt, *Ind. Eng. Chem. Res.* 54 (2015) 7953–7966.
- [12] T.M.T. Carvalho, L.M.P.F. Amaral, V.M.F. Morais, M.D.M.C. Ribeiro da Silva, *J. Chem. Thermodyn.* 85 (2015) 129–140.

**Table S7** Estimation of enthalpy of formation of PDABH by comparison with related compounds

1. Estimation of  $\Delta_{\text{sub}}H_{\text{m}}^{\circ}$  (298.15 K) value for bicyclo[3.1.0]hexane using group additivity method of Naef and Acree [1]<sup>a</sup>

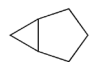

$$\Delta_{\text{sub}}H_{\text{m}}^{\circ}(\text{bicyclo}[3.1.0]\text{hexane}) = 4 [\text{H2C2}] + 2 [\text{HC3}] + \text{C} = 4 \cdot 6.88 + 2 \cdot 2.28 + 21.03 = 53.1 \text{ kJ} \cdot \text{mol}^{-1}$$

2. Estimation of correction in the sublimation enthalpy at 298.15 K when the cyclic C–C bond is replaced by cyclic N–N bond

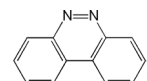

$$\Delta_{\text{sub}}H_{\text{m}}^{\circ} = 103.0 \pm 0.6 \text{ kJ} \cdot \text{mol}^{-1} [2]$$

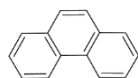

$$\Delta_{\text{sub}}H_{\text{m}}^{\circ} = 89.6 \pm 0.8 \text{ kJ} \cdot \text{mol}^{-1} [2]$$

$$\Delta_1 = \Delta_{\text{sub}}H_{\text{m}}^{\circ}(\text{N} - \text{N}) - \Delta_{\text{sub}}H_{\text{m}}^{\circ}(\text{C} - \text{C})$$

$$13.4 \text{ kJ} \cdot \text{mol}^{-1}$$

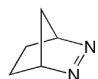

$$\Delta_{\text{sub}}H_{\text{m}}^{\circ} = 55.3 \pm 0.6 \text{ kJ} \cdot \text{mol}^{-1} [3]$$

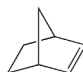

$$\Delta_{\text{sub}}H_{\text{m}}^{\circ} = 37.7 \pm 0.9 \text{ kJ} \cdot \text{mol}^{-1} [4]$$

$$17.6 \text{ kJ} \cdot \text{mol}^{-1}$$

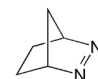

$$\Delta_{\text{sub}}H_{\text{m}}^{\circ} = 55.3 \pm 0.6 \text{ kJ} \cdot \text{mol}^{-1} [3]$$

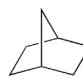

$$\Delta_{\text{sub}}H_{\text{m}}^{\circ} = 40.1 \pm 0.4 \text{ kJ} \cdot \text{mol}^{-1} [5]$$

$$15.2 \text{ kJ} \cdot \text{mol}^{-1}$$

average  $\Delta_1$

$$15.4 \text{ kJ} \cdot \text{mol}^{-1}$$

2. Estimation of correction in the sublimation enthalpy when the C–H bond is replaced by benzene ring

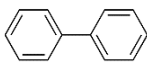

$$\Delta_{\text{sub}}H_{\text{m}}^{\circ} = 81.8 \pm 0.2 \text{ kJ} \cdot \text{mol}^{-1} [6]$$

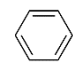

$$\Delta_{\text{sub}}H_{\text{m}}^{\circ} = 46.6 \pm 0.4 \text{ kJ} \cdot \text{mol}^{-1} [7]$$

$$\Delta_2 = \Delta_{\text{sub}}H_{\text{m}}^{\circ}(\text{C} - \text{C}_6\text{H}_5) - \Delta_{\text{sub}}H_{\text{m}}^{\circ}(\text{C} - \text{H})$$

$$35.2 \text{ kJ} \cdot \text{mol}^{-1}$$

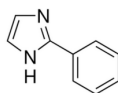

$$\Delta_{\text{sub}}H_{\text{m}}^{\circ} = 113.6 \pm 0.6 \text{ kJ} \cdot \text{mol}^{-1} [8]$$

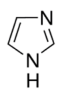

$$\Delta_{\text{sub}}H_{\text{m}}^{\circ} = 83.1 \pm 0.2 \text{ kJ} \cdot \text{mol}^{-1} [9]$$

$$30.5 \text{ kJ} \cdot \text{mol}^{-1}$$

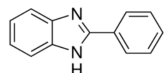

$$\Delta_{\text{sub}}H_{\text{m}}^{\circ} = 123.0 \pm 1.7 \text{ kJ}\cdot\text{mol}^{-1} \text{ [10]}$$

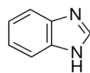

$$\Delta_{\text{sub}}H_{\text{m}}^{\circ} = 102.2 \pm 0.4 \text{ kJ}\cdot\text{mol}^{-1} \text{ [9]}$$

$$20.8 \text{ kJ}\cdot\text{mol}^{-1}$$

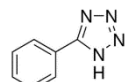

$$\Delta_{\text{sub}}H_{\text{m}}^{\circ} = 115.0 \pm 3.0 \text{ kJ}\cdot\text{mol}^{-1} \text{ [11]}$$

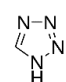

$$\Delta_{\text{sub}}H_{\text{m}}^{\circ} = 90.1 \pm 1.6 \text{ kJ}\cdot\text{mol}^{-1} \text{ [12]}$$

$$24.9 \text{ kJ}\cdot\text{mol}^{-1}$$

average  $\Delta_2$

$$27.9 \text{ kJ}\cdot\text{mol}^{-1}$$

### 3. Estimation of $\Delta_{\text{sub}}H_{\text{m}}^{\circ}$ (298.15 K) value for PDABH

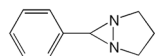

$$\Delta_{\text{sub}}H_{\text{m}}^{\circ}(\text{PDABH}) = \Delta_{\text{sub}}H_{\text{m}}^{\circ}(\text{bicyclo}[3.1.0]\text{hexane}) + \Delta_1 + \Delta_2 = 53.1 + 15.4 + 27.9 = \mathbf{96.4 \text{ kJ}\cdot\text{mol}^{-1}}$$

<sup>a</sup>Bicyclo[3.1.0]hexane is the liquid compound. Its enthalpy of vaporization estimated using the group contribution values by Naef and Acree [1] gives the value of  $34.4 \text{ kJ}\cdot\text{mol}^{-1}$  in good agreement with the experimental value ( $33.5 \pm 0.4 \text{ kJ}\cdot\text{mol}^{-1}$  [13]); to estimate the enthalpy of sublimation, the corresponding group contributions for the enthalpy of sublimation were used.

### References

- [1] R. Naef, W.E. Acree Jr., *Molecules* 22 (2017) 1059.
- [2] H.K. Cammenga, V.N. Emel'yanenko, S.P. Verevkin, *Ind. Eng. Chem. Res.* 48 (2009) 10120–10128.
- [3] P.S. Engel, R.A. Melaugh, M. Månsson, J. W. Timberlake, A.W. Garner, F.D. Rossini, *J. Chem. Thermodyn.* 8 (1976) 607–621.
- [4] W.V. Steele, *J. Chem. Thermodyn.* 10 (1978) 919–927.
- [5] S.P. Verevkin, V.N. Emel'yanenko, *J. Phys. Chem. A* 108 (2004) 6575–6580.
- [6] D.H. Zaitsau, V.N. Emel'yanenko, A.A. Pimerzin, S.P. Verevkin, *J. Chem. Thermodyn.* 122 (2018) 1–12.
- [7] M.J.S. Monte, A.R.R.P. Almeida, *Struct. Chem.* 24 (2013) 2001–2016.
- [8] L. Infantes, O. Mó, M. Yáñez, M.V. Roux, P. Jiménez, J.Z. Dávalos, M. Temprado, M.A.V. Ribeiro da Silva, M.D.M.C. Ribeiro da Silva, L.M.P.F. Amaral, P. Cabildo, R. Claramunt, J. Elguero, *J. Phys. Chem. A* 110 (2006) 2535–2544.
- [9] P. Jiménez, M.V. Roux, C. Turrión, F. Gomis, *J. Chem. Thermodyn.* 19 (1987) 985–992.
- [10] M.A.V. Ribeiro da Silva, M.D.M.C. Ribeiro da Silva, L.M.P.F. Amaral, J. Elguero, P. Jiménez, M.V. Roux, J.Z. Dávalos, M. Temprado, P. Cabildo, R.M. Claramunt, O. Mó, M. Yáñez, *J. Chem. Thermodyn.* 37 (2005) 1168–1176.

- [11] A.A. Balepin, V.P. Lebedev, E.A. Miroshnichenko, G.I. Koldobskii, V.A. Ostovskii, B.P. Larionov, B.V. Gidasov, Yu.A. Lebedev, *Svoistva Veshchestv Str. Mol.*, 1977, 93-98 (cited from NIST Chemistry WebBook, <http://webbook.nist.gov/chemistry/>).
- [12] A.A. Kozyro, V.V. Simirskii, G.Ya. Kabo, M.L. Frenkel, A.P. Krasulin, V.M. Sevruk, N.A. Sokolov, *Russ. J. Phys. Chem.* 64 (1990) 1274-1275.
- [13] S. Chang, D. McNally, S. Shary-Tehrany, S.M.J. Hickey, R.H. Boyd, *J. Am. Chem. Soc.* 92 (1970) 3109–3118.
